# Supplementary material for: A facial foundation model for multi-system biomarker and disease risk prediction with real-world mobile deployment
Source: Research Square preprint supplement (doi:10.21203/rs.3.rs-8110055/v1), 2026-01-21
Supplement: Supplementary file 1 [file dd46bb3728b020ce6c269a97.xlsx]

## Sheet: Index
Supplementary Tables Index
Supplementary Table 1. List of Biochemical Markers and Organ System Groupings
Supplementary Table 2. Summary of Facial Image Datasets Used in This Study
Supplementary Table 3. Participant baseline characteristics of internal and external cohorts
Supplementary Table 4. Average R2 of Organ System across Internal and External Datasets
Supplementary Table 5. R2 of Biomarkers from Internal Validation and External Validation
Supplementary Table 6. Relative importance and residual corrleation of facial prediction score adjusted with common factors
Supplementary Table 7. Predictive performance of polygenic risk scores (PRS) and face prediction in the AZ-GEV cohort
Supplementary Table 8. Relative importance of polygenic risk scores (PRS) and face prediction in the AZ-GEV cohort
Supplementary Table 9. Associations between cardiovascular-related biomarkers (face-predicted and laboratory-measured) and vascular stenosis severity (＜50% verse ≥50%).
Supplementary Table 10. Area under the receiver operating characteristic curve (AUC) for three stenosis-classification models in internal (AZ-TR) and external (DX-EV) cohorts
Supplementary Table 11. Relative importance of face-predicted biomarkers versus laboratory-measured counterparts in Model 3
Supplementary Table 12. Intra-Class Correlation Coefficient (ICC) Analysis of Model Robustness Across Internal and External Datasets
Supplementary Table 13. Average Intra-Class Correlation Coefficient (ICC) Analysis of FaceFound Robustness Across Internal and External Datasets for 8 Systems
Supplementary Table 14. R2 across internal and external cohort of UMMAE and baseline models under varying training sample sizes
Supplementary Table 15. Participant baseline characteristics of APP-EV (N=110)
Supplementary Table 16. Predictive performance of FaceFound in the APP-EV cohort
Supplementary Table 17. ICC of APP-EV comparing to internal and external cohorts

## Sheet: Supplementary Table1
List of Biochemical Markers and Organ System Groupings
Organ System	Biomarker Name	Abbreviation	Unit
Digestive	Albumin/Globulin Ratio	AG	ratio
Anthropometrics	Age	Age	year
Digestive	Albumin	Alb	g/L
Digestive	Alkaline Phosphatase	ALP	U/L
Digestive	Alanine Aminotransferase	ALT	U/L
Hematology	Activated Partial Thromboplastin Time	APTT	Sec
Digestive	Aspartate Aminotransferase	AST	U/L
Anthropometrics	Body Mass Index	BMI	kg/m²
Cardiovascular	B-type Natriuretic Peptide	BNP	pg/ml
Immune	Complement Component 1q	C1q	mg/L
Cardiovascular	Creatine Kinase	CK	U/L
Cardiovascular	Creatine Kinase-MB	CK-MB	ng/ml
Electrolytes	Chloride	Cl	mmol/L
Renal	Creatinine	Cr	μmol/L
Digestive	Direct Bilirubin	D-Bil	μmol/L
Hematology, Cardiovascular	D-dimer	D-Dimer	ng/ml
Renal	Estimated Glomerular Filtration Rate	eGFR(CKD-EPI)	mL/min/1.73m²
Hematology	Fibrinogen	FBG	g/L
Endocrine	Free Fatty Acids	FFA	mmol/L
Endocrine	Free Triiodothyronine	FT3	pmol/L
Endocrine	Free Thyroxine	FT4	pmol/L
Digestive	Gamma-glutamyl Transferase	GGT	U/L
Endocrine	Glucose	Glu	mmol/L
Hematology	Hemoglobin	Hb	g/L
Endocrine	Glycated Hemoglobin	HbA1C%	%
Hematology	Hematocrit	HCT	%
Cardiovascular	Homocysteine	Hcy	μmol/L
Cardiovascular	High-density Lipoprotein Cholesterol	HDLC	mmol/L
Anthropometrics	Height	Height	cm
Immune, Cardiovascular	High-sensitivity C-reactive Protein	hs-CRP	mg/L
Cardiovascular	High-sensitivity Troponin I	hsTnI	ng/L
Hematology	International Normalized Ratio	INR	\
Endocrine	Insulin	Isn	μU/ml
Electrolytes	K	K	mmol/L
Digestive, Cardiovascular	Lactate Dehydrogenase	LDH	U/L
Cardiovascular	Low-density Lipoprotein Cholesterol	LDLC	mmol/L
Cardiovascular	Lipoprotein(a)	LPa	nmol/L
Immune	Lymphocyte Count	LYM	10^9/L
Immune	Lymphocyte Percentage	LYM%	%
Hematology	Mean Corpuscular Hemoglobin	MCH	pg
Hematology	Mean Corpuscular Hemoglobin Concentration	MCHC	g/L
Hematology	Mean Corpuscular Volume	MCV	fL
Hematology	Mean Platelet Volume	MPV	fL
Electrolytes	Sodium	Na	mmol/L
Immune	Neutrophil Count	NE	10^9/L
Immune	Neutrophil Percentage	NE%	%
Cardiovascular	Non-high-density Lipoprotein Cholesterol	nonHDL	mmol/L
Immune	Procalcitonin	PCT	%
Hematology	Platelet Count	PLT	10^9/L
Hematology	Red Blood Cell Count	RBC	10^12/L
Cardiovascular	Small Dense LDL Cholesterol	sdLDL	mmol/L
Endocrine	Total Triiodothyronine	TT3	nmol/L
Endocrine	Total Thyroxine	TT4	nmol/L
Digestive	Total Bilirubin	T-Bil	μmol/L
Cardiovascular	Total Cholesterol	TC	mmol/L
Cardiovascular	Triglycerides	TG	mmol/L
Digestive	Total Protein	TP	g/L
Endocrine	Thyroid Stimulating Hormone	TSH	mIU/L
Renal	Uric Acid	UA	μmol/L
Renal	Urea	Urea	mg/dl
Immune	White Blood Cell Count	WBC	mmol/L
Anthropometrics	Weight	Weight	kg

## Sheet: Supplementary Table 2
Summary of Facial Image Datasets Used in This Study
Dataset Name	Abbreviation	Source / Institution	Sample Size	Image Numbers	Intended Use
ImageNet- 22K	ImageNet- 22K	https://www.image-net.org/	\	14197122	Pretraining
VGGFace-HQ	VGGFace-HQ	https://github.com/NNNNAI/VGGFace2-HQ	\	1160250	Pretraining
Anzhen 2021–Q2 2023 Training Cohort Unfiltered	AZ-TR-unfiltered	Beijing Anzhen Hospital Affiliated to Capital Medical University (Chaoyang campus)	\	88489	Pretraining
Anzhen 2021–Q2 2023 Training Cohort	AZ-TR	Beijing Anzhen Hospital Affiliated to Capital Medical University (Chaoyang campus)	4698	32184	Train & Internal Validation
Anzhen Q3–Q4 2023 External Validation Cohort	AZ-EV1	Beijing Anzhen Hospital Affiliated to Capital Medical University (Chaoyang campus)	1498	13645	External Validation
Anzhen 2024 External Validation Cohort	AZ-EV2	Beijing Anzhen Hospital Affiliated to Capital Medical University (Chaoyang campus)	2247	22524	External Validation
Anzhen Tongzhou Q1 2025 External Validation Cohort	AZTZ-EV	Beijing Anzhen Hospital Affiliated to Capital Medical University (Tongzhou campus)	206	206	External Validation
Daxing 2021–2022 External Validation Cohort	DX-EV	Beijing Daxing Hospital, Capital Medical University	900	2768	External Validation
Anzhen Genetics External Validation Cohort	AZ-GEV	Beijing Anzhen Hospital Affiliated to Capital Medical University (Tongzhou campus)	111	111	Genetics & External Validation
Anzhen Tongzhou app images validation cohorwt	APP-EV	Beijing Anzhen Hospital Affiliated to Capital Medical University (Tongzhou campus)	110	110	External Validation of selfie
Note: Sample sizes are missing from the original source of ImageNet-22K, VGGFace-HQ and AZ-TR-unfiltered datasets.

## Sheet: Supplementary Table 3
Participant baseline characteristics of internal and external cohorts
	Internal Cohorts (7:2:1)	External Cohorts
	AZ-TR	AZ-EV1	AZ-EV2	AZTZ-EV	DX-EV	AZ-GEV
	(N=4,698)	(N=1,498)	(N=2,247)	(N=206)	(N=900)	(N=111)
Age, median [Q1,Q3]	60.0 [54.0,67.0]	61.0 [54.0,67.0]	60.0 [53.0,66.0]	61.0 [56.0,68.0]	62.0 [56.0,69.0]	59.0 [52.0,65.5]
AG, median [Q1,Q3]	1.7 [1.5,1.9]	1.6 [1.5,1.8]	1.6 [1.5,1.8]	\	\	\
ALP, median [Q1,Q3]	76.0 [64.0,91.0]	76.0 [63.0,92.0]	77.0 [65.0,91.0]	77.7 [64.1,91.2]	75.0 [63.0,91.0]	72.0 [60.2,91.5]
ALT, median [Q1,Q3]	20.0 [14.0,29.0]	21.0 [15.0,32.0]	22.0 [16.0,31.0]	21.8 [17.0,31.7]	19.0 [13.5,26.0]	21.0 [16.0,28.5]
APTT, median [Q1,Q3]	31.1 [29.3,33.0]	30.8 [29.0,32.6]	31.0 [29.3,32.9]	26.2 [24.4,28.5]	31.8 [29.9,34.0]	32.2 [30.1,33.7]
AST, median [Q1,Q3]	19.0 [15.0,23.0]	20.0 [16.0,25.0]	21.0 [17.0,26.0]	20.5 [17.6,25.9]	20.0 [17.0,25.0]	21.0 [17.0,25.0]
Alb, median [Q1,Q3]	45.7 [43.4,47.8]	42.8 [40.1,45.3]	43.1 [40.8,45.6]	43.0 [40.2,45.8]	40.6 [38.1,43.4]	43.5 [40.5,45.5]
BMI, median [Q1,Q3]	25.0 [23.0,28.0]	26.1 [24.1,28.2]	25.9 [24.0,28.1]	26.3 [23.2,28.7]	26.3 [23.9,28.6]	26.2 [24.3,28.6]
BNP, median [Q1,Q3]	37.0 [19.8,75.2]	37.0 [19.0,76.0]	38.0 [18.0,78.0]	49.4 [25.5,79.2]	50.0 [37.0,78.0]	37.0 [17.5,60.0]
C1q, median [Q1,Q3]	174.7 [153.1,202.9]	174.5 [148.5,202.9]	170.9 [146.9,199.5]	\	176.0 [154.0,195.5]	\
Cl, median [Q1,Q3]	104.5 [102.7,106.1]	104.4 [102.8,106.0]	103.9 [102.3,105.6]	\	\	\
CK, median [Q1,Q3]	81.0 [60.0,112.0]	77.0 [58.0,105.0]	82.0 [60.0,113.0]	75.0 [57.4,105.2]	79.0 [58.0,111.0]	87.0 [62.0,117.0]
CK-MB, median [Q1,Q3]	1.8 [1.3,2.4]	1.6 [1.2,2.2]	1.5 [1.1,2.1]	1.6 [1.1,2.2]	\	1.3 [0.9,1.7]
Cr, median [Q1,Q3]	75.1 [66.0,85.2]	75.3 [66.2,85.8]	76.0 [66.8,87.0]	76.3 [69.3,88.6]	66.0 [55.0,76.5]	76.5 [62.6,85.2]
D-Bil, median [Q1,Q3]	4.5 [3.5,5.8]	4.1 [3.1,5.5]	3.5 [2.5,4.7]	3.2 [2.4,4.5]	2.6 [2.0,3.4]	3.3 [2.4,4.3]
D-Dimer, median [Q1,Q3]	81.0 [53.0,125.0]	73.0 [43.0,118.0]	59.0 [34.0,100.0]	\	\	56.0 [26.0,83.8]
eGFR(CKD-EPI), median [Q1,Q3]	91.9 [81.0,100.4]	90.8 [79.2,98.4]	91.0 [80.2,98.8]	87.8 [73.2,98.0]	94.2 [85.8,101.2]	92.9 [81.3,99.5]
FBG, median [Q1,Q3]	3.1 [2.7,3.4]	\	\	\	2.8 [2.5,3.2]	\
FFA, median [Q1,Q3]	0.5 [0.3,0.6]	0.5 [0.3,0.7]	0.5 [0.3,0.7]	0.5 [0.3,0.7]	\	0.5 [0.4,0.7]
FT3, median [Q1,Q3]	4.8 [4.4,5.2]	4.8 [4.4,5.2]	5.0 [4.6,5.4]	5.0 [4.7,5.5]	4.9 [4.5,5.2]	4.8 [4.4,5.2]
FT4, median [Q1,Q3]	11.0 [9.8,12.3]	11.1 [9.8,12.3]	10.7 [9.5,12.0]	10.9 [9.5,12.3]	10.7 [9.5,12.1]	11.3 [10.5,12.8]
GGT, median [Q1,Q3]	25.0 [18.0,39.0]	26.0 [19.0,39.0]	25.0 [18.0,38.0]	25.0 [19.1,42.2]	23.0 [17.0,34.8]	26.5 [17.8,39.5]
Glu, median [Q1,Q3]	5.9 [5.0,7.7]	5.8 [5.1,7.5]	5.8 [5.1,7.2]	6.1 [5.3,7.9]	5.8 [5.1,6.9]	5.5 [5.1,7.1]
HCT, median [Q1,Q3]	41.9 [39.1,44.6]	41.8 [39.3,44.5]	42.4 [39.7,44.9]	41.2 [38.7,44.1]	40.6 [37.4,43.9]	42.6 [39.5,45.9]
HDLC, median [Q1,Q3]	1.1 [0.9,1.2]	1.1 [0.9,1.2]	1.1 [0.9,1.3]	1.1 [1.0,1.3]	1.1 [1.0,1.3]	1.1 [1.0,1.3]
Hb, median [Q1,Q3]	145.0 [134.0,154.0]	146.0 [137.0,156.0]	146.0 [136.0,155.0]	140.0 [131.0,150.0]	131.0 [121.0,142.0]	144.0 [134.5,156.5]
HbA1C%, median [Q1,Q3]	6.0 [5.6,6.9]	6.2 [5.7,7.2]	6.1 [5.7,7.0]	6.3 [5.8,7.4]	6.4 [5.8,7.3]	6.0 [5.8,6.8]
Hcy, median [Q1,Q3]	13.4 [11.4,16.5]	12.6 [10.6,15.5]	13.2 [11.0,15.9]	11.6 [8.9,14.9]	12.5 [10.5,15.9]	12.4 [9.3,15.2]
Height, median [Q1,Q3]	168.0 [161.0,173.0]	168.0 [161.0,173.0]	169.0 [163.0,173.0]	165.0 [159.0,170.0]	164.0 [158.0,170.0]	168.5 [162.0,171.0]
INR, median [Q1,Q3]	1.0 [1.0,1.0]	1.0 [0.9,1.0]	1.0 [0.9,1.0]	1.0 [0.9,1.0]	1.0 [0.9,1.0]	1.0 [0.9,1.0]
Isn, median [Q1,Q3]	13.7 [8.5,23.9]	13.1 [8.8,23.5]	13.8 [9.0,22.2]	17.8 [10.1,34.2]	\	11.4 [8.4,16.6]
K, median [Q1,Q3]	4.1 [3.9,4.3]	4.1 [3.9,4.3]	4.0 [3.8,4.2]	\	\	\
LDH, median [Q1,Q3]	171.0 [153.0,191.0]	175.0 [155.1,199.1]	181.0 [160.0,205.0]	184.0 [165.8,204.5]	166.0 [144.0,187.0]	180.0 [163.0,198.0]
LDLC, median [Q1,Q3]	2.0 [1.5,2.6]	1.9 [1.5,2.6]	2.0 [1.5,2.5]	2.1 [1.7,2.5]	2.4 [1.9,3.1]	2.1 [1.6,2.7]
LPa, median [Q1,Q3]	26.3 [9.8,70.3]	22.2 [9.1,66.2]	23.2 [9.4,64.6]	30.2 [11.0,68.2]	\	24.7 [10.9,42.6]
LYM, median [Q1,Q3]	1.6 [1.3,2.0]	1.6 [1.3,1.9]	1.6 [1.3,2.0]	1.7 [1.4,2.0]	1.9 [1.5,2.3]	1.7 [1.3,2.0]
LYM%, median [Q1,Q3]	26.5 [21.3,31.7]	25.5 [20.4,30.8]	25.5 [20.6,30.3]	\	\	\
MCH, median [Q1,Q3]	31.2 [30.3,32.2]	31.4 [30.4,32.4]	31.2 [30.2,32.2]	\	\	\
MCHC, median [Q1,Q3]	344.0 [339.0,350.0]	347.0 [342.0,353.0]	344.0 [338.0,350.0]	\	\	\
MCV, median [Q1,Q3]	90.6 [88.1,93.1]	90.5 [87.8,93.0]	89.5 [86.3,92.1]	\	\	\
MPV, median [Q1,Q3]	9.9 [9.2,10.6]	9.6 [8.8,10.3]	9.7 [8.9,10.4]	10.0 [9.3,10.8]	9.9 [9.2,10.7]	9.6 [8.9,10.4]
NE, median [Q1,Q3]	4.1 [3.3,5.0]	4.1 [3.3,5.1]	4.1 [3.3,5.0]	4.3 [3.5,5.4]	3.9 [3.1,4.8]	3.9 [3.2,5.0]
NE%, median [Q1,Q3]	65.5 [59.7,71.0]	66.1 [60.3,71.6]	65.7 [60.7,71.4]	\	\	\
Na, median [Q1,Q3]	141.1 [139.7,142.5]	141.1 [139.1,142.5]	139.2 [137.4,141.4]	\	\	\
PCT, median [Q1,Q3]	0.2 [0.2,0.2]	0.2 [0.2,0.2]	0.2 [0.2,0.2]	0.2 [0.2,0.2]	0.2 [0.2,0.2]	0.2 [0.2,0.2]
PLT, median [Q1,Q3]	218.0 [183.0,256.0]	223.5 [187.0,261.0]	217.0 [184.0,254.0]	222.5 [192.0,254.8]	216.0 [187.0,252.0]	211.0 [187.5,241.5]
RBC, median [Q1,Q3]	4.6 [4.3,4.9]	4.6 [4.3,5.0]	4.7 [4.4,5.0]	4.6 [4.3,4.9]	4.5 [4.2,4.9]	4.7 [4.3,5.1]
T-Bil, median [Q1,Q3]	10.5 [7.9,14.0]	11.4 [8.6,15.1]	12.7 [9.6,16.8]	11.7 [9.1,14.8]	11.9 [9.0,15.4]	13.2 [10.6,17.9]
T3, median [Q1,Q3]	1.6 [1.4,1.7]	1.6 [1.4,1.8]	1.6 [1.4,1.9]	1.7 [1.5,1.8]	1.4 [1.2,1.6]	1.6 [1.4,1.8]
T4, median [Q1,Q3]	115.8 [102.2,130.8]	122.0 [107.3,136.5]	127.1 [113.0,143.6]	128.3 [117.5,146.2]	112.9 [98.8,126.1]	122.2 [107.2,138.9]
TC, median [Q1,Q3]	3.9 [3.3,4.6]	3.7 [3.1,4.4]	3.7 [3.1,4.4]	3.6 [3.2,4.4]	4.0 [3.4,4.9]	4.0 [3.3,4.8]
TG, median [Q1,Q3]	1.5 [1.1,2.1]	1.4 [1.1,2.1]	1.4 [1.0,2.0]	1.4 [1.1,2.2]	1.3 [1.0,1.9]	1.6 [1.1,2.0]
TP, median [Q1,Q3]	72.9 [69.3,76.3]	72.3 [68.7,75.8]	72.0 [68.7,75.4]	72.1 [68.8,75.7]	\	70.8 [68.2,74.8]
TSH, median [Q1,Q3]	1.7 [1.1,2.6]	1.6 [1.1,2.5]	1.7 [1.1,2.5]	1.9 [1.2,2.8]	1.9 [1.3,3.0]	1.6 [1.1,2.3]
UA, median [Q1,Q3]	333.4 [277.5,396.0]	331.9 [277.6,395.1]	340.2 [284.6,402.3]	306.0 [254.1,349.3]	325.0 [275.5,387.0]	375.6 [295.5,438.7]
Urea, median [Q1,Q3]	5.6 [4.7,6.7]	5.6 [4.8,6.8]	5.8 [4.9,7.1]	5.8 [5.0,7.0]	5.3 [4.4,6.3]	5.8 [4.9,6.9]
WBC, median [Q1,Q3]	6.3 [5.3,7.5]	6.3 [5.3,7.5]	6.2 [5.3,7.5]	6.6 [5.6,7.9]	6.4 [5.4,7.6]	6.3 [5.3,7.8]
Weight, median [Q1,Q3]	72.0 [64.0,80.2]	72.0 [65.0,80.0]	73.0 [65.0,81.0]	70.0 [64.0,77.0]	70.0 [63.0,80.0]	74.0 [65.0,83.0]
hs-CRP, median [Q1,Q3]	1.0 [0.5,2.2]	1.0 [0.6,2.4]	1.0 [0.6,2.3]	1.4 [0.7,3.1]	1.7 [0.9,3.7]	1.0 [0.6,2.4]
hsTnI, median [Q1,Q3]	3.8 [2.1,7.5]	4.1 [2.4,8.6]	3.7 [2.0,8.5]	5.9 [3.3,13.5]	\	3.0 [1.6,5.5]
nonHDL, median [Q1,Q3]	2.7 [2.2,3.5]	2.6 [2.1,3.3]	2.6 [2.1,3.3]	\	\	\
sdLDL, median [Q1,Q3]	0.7 [0.5,0.9]	0.6 [0.5,0.9]	0.6 [0.4,0.9]	0.8 [0.6,1.2]	\	0.6 [0.5,0.8]
Female (%)	1242 (26.4)	366 (24.4)	499 (22.2)	82 (39.8)	449 (49.9)	34 (30.6)
Male (%)	3456 (73.6)	1132 (75.6)	1748 (77.8)	124 (60.2)	451 (50.1)	77 (69.4)
No Stenosis (%)	1213 (25.8)	\	\	\	387 (43.0)	\
Stenosis (%)	3485 (74.2)	\	\	\	513 (57.0)	\
Note: \ represents the missing measurement for specific biomarker in external cohorts.

## Sheet: Supplementary Table 4
Average R2 of Organ System across Internal and External Datasets
Center	AZ-TR			AZ-EV1			AZ-EV2			AZTZ-EV			DX-EV
Organ System	ResNet18	SwinLarge	FaceFound	ResNet18	SwinLarge	FaceFound	ResNet18	SwinLarge	FaceFound	ResNet18	SwinLarge	FaceFound	ResNet18	SwinLarge	FaceFound
Anthropometrics	0.429 (0.291 - 0.630, N=4)	0.491 (0.353 - 0.671, N=4)	0.493 (0.361 - 0.666, N=4)	0.443 (0.348 - 0.599, N=4)	0.465 (0.379 - 0.609, N=4)	0.471 (0.377 - 0.620, N=4)	0.508 (0.484 - 0.600, N=4)	0.526 (0.511 - 0.609, N=4)	0.521 (0.493 - 0.615, N=4)	0.496 (0.406 - 0.620, N=4)	0.495 (0.417 - 0.619, N=4)	0.532 (0.465 - 0.641, N=4)	0.430 (0.350 - 0.555, N=4)	0.503 (0.444 - 0.612, N=4)	0.427 (0.369 - 0.541, N=4)
Cardiovascular	0.004 (0.002 - 0.015, N=15)	0.025 (0.002 - 0.045, N=15)	0.037 (0.010 - 0.051, N=15)	0.007 (0.002 - 0.020, N=15)	0.018 (0.004 - 0.041, N=15)	0.026 (0.013 - 0.042, N=15)	0.007 (0.001 - 0.014, N=15)	0.012 (0.002 - 0.022, N=15)	0.023 (0.009 - 0.033, N=15)	0.001 (0.000 - 0.009, N=13)	0.019 (0.000 - 0.051, N=13)	0.026 (0.002 - 0.058, N=13)	0.009 (0.003 - 0.025, N=9)	0.011 (0.007 - 0.041, N=9)	0.010 (0.006 - 0.049, N=9)
Digestive	0.011 (0.003 - 0.043, N=10)	0.039 (0.008 - 0.049, N=10)	0.035 (0.013 - 0.071, N=10)	0.014 (0.003 - 0.021, N=10)	0.024 (0.019 - 0.033, N=10)	0.036 (0.020 - 0.041, N=10)	0.008 (0.002 - 0.017, N=10)	0.012 (0.005 - 0.021, N=10)	0.022 (0.009 - 0.033, N=10)	0.005 (0.001 - 0.050, N=9)	0.012 (0.003 - 0.027, N=9)	0.031 (0.010 - 0.046, N=9)	0.014 (0.002 - 0.017, N=8)	0.021 (0.009 - 0.048, N=8)	0.018 (0.004 - 0.057, N=8)
Electrolytes	0.011 (0.007 - 0.014, N=3)	0.023 (0.012 - 0.024, N=3)	0.020 (0.013 - 0.036, N=3)	0.002 (0.001 - 0.003, N=3)	0.003 (0.002 - 0.003, N=3)	0.006 (0.003 - 0.007, N=3)	0.000 (0.000 - 0.000, N=3)	0.001 (0.001 - 0.004, N=3)	0.001 (0.000 - 0.001, N=3)	\	\	\	\	\	\
Endocrine	0.003 (0.002 - 0.012, N=10)	0.005 (0.001 - 0.037, N=10)	0.024 (0.007 - 0.055, N=10)	0.004 (0.002 - 0.012, N=9)	0.009 (0.001 - 0.035, N=9)	0.023 (0.003 - 0.047, N=9)	0.001 (0.000 - 0.007, N=9)	0.007 (0.000 - 0.017, N=9)	0.003 (0.002 - 0.017, N=9)	0.004 (0.002 - 0.010, N=9)	0.018 (0.000 - 0.033, N=9)	0.012 (0.005 - 0.045, N=9)	0.001 (0.000 - 0.011, N=8)	0.008 (0.001 - 0.030, N=8)	0.006 (0.000 - 0.042, N=8)
Hematology	0.022 (0.004 - 0.165, N=11)	0.020 (0.015 - 0.198, N=11)	0.036 (0.022 - 0.208, N=11)	0.006 (0.003 - 0.113, N=11)	0.014 (0.007 - 0.130, N=11)	0.017 (0.007 - 0.135, N=11)	0.009 (0.002 - 0.112, N=11)	0.006 (0.002 - 0.124, N=11)	0.010 (0.006 - 0.142, N=11)	0.041 (0.020 - 0.254, N=7)	0.032 (0.017 - 0.264, N=7)	0.028 (0.013 - 0.282, N=7)	0.020 (0.005 - 0.033, N=7)	0.021 (0.007 - 0.152, N=7)	0.029 (0.005 - 0.146, N=7)
Immune	0.010 (0.001 - 0.023, N=8)	0.012 (0.007 - 0.033, N=8)	0.034 (0.022 - 0.073, N=8)	0.017 (0.002 - 0.022, N=8)	0.030 (0.017 - 0.040, N=8)	0.049 (0.041 - 0.058, N=8)	0.011 (0.001 - 0.015, N=8)	0.018 (0.009 - 0.028, N=8)	0.035 (0.025 - 0.056, N=8)	0.003 (0.002 - 0.008, N=5)	0.019 (0.008 - 0.023, N=5)	0.012 (0.011 - 0.016, N=5)	0.006 (0.002 - 0.013, N=6)	0.023 (0.013 - 0.029, N=6)	0.020 (0.020 - 0.024, N=6)
Renal	0.069 (0.023 - 0.146, N=4)	0.078 (0.030 - 0.155, N=4)	0.081 (0.038 - 0.161, N=4)	0.082 (0.015 - 0.159, N=4)	0.088 (0.032 - 0.155, N=4)	0.081 (0.024 - 0.155, N=4)	0.069 (0.023 - 0.128, N=4)	0.068 (0.034 - 0.115, N=4)	0.073 (0.034 - 0.129, N=4)	0.069 (0.049 - 0.154, N=4)	0.135 (0.112 - 0.187, N=4)	0.096 (0.059 - 0.202, N=4)	0.059 (0.035 - 0.091, N=4)	0.125 (0.072 - 0.170, N=4)	0.136 (0.076 - 0.185, N=4)
Note: \ represents the missing measurement for specific biomarker in external cohorts.

## Sheet: Supplementary Table 5
R2 of Biomarkers from Internal Validation and External Validation
Center	AZ-TR				AZ-EV1				AZ-EV2				AZTZ-EV				DX-EV
Biomarker Name	ResNet18	SwinLarge	FaceFound	N	ResNet18	SwinLarge	FaceFound	N	ResNet18	SwinLarge	FaceFound	N	ResNet18	SwinLarge	FaceFound	N	ResNet18	SwinLarge	FaceFound	N
Age	0.854 (0.829, 0.878), adjusted P-Value = 0.00e+00	0.870 (0.848, 0.892), adjusted P-Value = 0.00e+00	0.873 (0.852, 0.895), adjusted P-Value = 0.00e+00	480	0.861 (0.848, 0.874), adjusted P-Value = 0.00e+00	0.864 (0.851, 0.877), adjusted P-Value = 0.00e+00	0.863 (0.850, 0.876), adjusted P-Value = 0.00e+00	1498	0.853 (0.842, 0.865), adjusted P-Value = 0.00e+00	0.846 (0.834, 0.858), adjusted P-Value = 0.00e+00	0.843 (0.831, 0.855), adjusted P-Value = 0.00e+00	2247	0.818 (0.773, 0.863), adjusted P-Value = 1.48e-200	0.800 (0.751, 0.849), adjusted P-Value = 1.80e-178	0.819 (0.774, 0.864), adjusted P-Value = 3.04e-201	206	0.794 (0.770, 0.818), adjusted P-Value = 0.00e+00	0.833 (0.812, 0.853), adjusted P-Value = 0.00e+00	0.789 (0.764, 0.814), adjusted P-Value = 0.00e+00	900
AG	0.018 (-0.006, 0.043), adjusted P-Value = 5.81e-03	0.005 (-0.008, 0.018), adjusted P-Value = 1.61e-01	0.001 (-0.004, 0.005), adjusted P-Value = 6.52e-01	462	0.000 (-0.001, 0.001), adjusted P-Value = 8.08e-01	0.000 (-0.002, 0.002), adjusted P-Value = 5.57e-01	0.002 (-0.003, 0.006), adjusted P-Value = 1.34e-01	1474	0.001 (-0.002, 0.005), adjusted P-Value = 1.19e-01	0.000 (-0.001, 0.001), adjusted P-Value = 6.66e-01	0.001 (-0.002, 0.003), adjusted P-Value = 2.48e-01	2141	\	\	\	\	\	\	\	\
ALP	0.003 (-0.007, 0.012), adjusted P-Value = 3.33e-01	0.005 (-0.008, 0.017), adjusted P-Value = 1.88e-01	0.010 (-0.008, 0.028), adjusted P-Value = 4.71e-02	462	0.020 (0.004, 0.037), adjusted P-Value = 2.39e-06	0.022 (0.005, 0.039), adjusted P-Value = 7.67e-07	0.026 (0.007, 0.044), adjusted P-Value = 9.00e-08	1152	0.004 (-0.004, 0.011), adjusted P-Value = 7.60e-02	0.003 (-0.004, 0.010), adjusted P-Value = 1.10e-01	0.006 (-0.004, 0.017), adjusted P-Value = 1.67e-02	1012	0.027 (-0.031, 0.085), adjusted P-Value = 1.03e-01	0.037 (-0.030, 0.103), adjusted P-Value = 5.48e-02	0.086 (-0.011, 0.183), adjusted P-Value = 1.94e-03	116	0.017 (-0.000, 0.034), adjusted P-Value = 1.93e-04	0.017 (0.000, 0.035), adjusted P-Value = 1.53e-04	0.009 (-0.003, 0.022), adjusted P-Value = 6.73e-03	895
ALT	0.058 (0.016, 0.100), adjusted P-Value = 3.01e-07	0.049 (0.010, 0.088), adjusted P-Value = 2.54e-06	0.075 (0.028, 0.122), adjusted P-Value = 3.18e-09	462	0.041 (0.021, 0.061), adjusted P-Value = 5.37e-15	0.050 (0.028, 0.072), adjusted P-Value = 3.77e-18	0.039 (0.020, 0.059), adjusted P-Value = 2.49e-14	1495	0.030 (0.016, 0.044), adjusted P-Value = 4.19e-16	0.037 (0.022, 0.053), adjusted P-Value = 7.31e-20	0.036 (0.021, 0.051), adjusted P-Value = 3.46e-19	2247	0.068 (0.002, 0.135), adjusted P-Value = 2.25e-04	0.087 (0.013, 0.161), adjusted P-Value = 2.38e-05	0.070 (0.003, 0.138), adjusted P-Value = 1.80e-04	206	0.052 (0.023, 0.081), adjusted P-Value = 8.46e-12	0.087 (0.051, 0.123), adjusted P-Value = 1.97e-19	0.071 (0.038, 0.104), adjusted P-Value = 7.88e-16	895
APTT	0.000 (-0.003, 0.003), adjusted P-Value = 7.94e-01	0.009 (-0.008, 0.026), adjusted P-Value = 5.75e-02	0.004 (-0.008, 0.016), adjusted P-Value = 1.98e-01	471	0.001 (-0.002, 0.005), adjusted P-Value = 1.99e-01	0.014 (0.002, 0.026), adjusted P-Value = 9.10e-06	0.017 (0.004, 0.030), adjusted P-Value = 1.02e-06	1495	0.001 (-0.001, 0.003), adjusted P-Value = 3.25e-01	0.003 (-0.002, 0.007), adjusted P-Value = 2.50e-02	0.005 (-0.001, 0.011), adjusted P-Value = 1.10e-03	2242	0.041 (-0.012, 0.094), adjusted P-Value = 5.65e-03	0.001 (-0.008, 0.010), adjusted P-Value = 6.88e-01	0.002 (-0.010, 0.014), adjusted P-Value = 5.96e-01	205	0.001 (-0.003, 0.004), adjusted P-Value = 5.47e-01	0.013 (-0.002, 0.029), adjusted P-Value = 1.17e-03	0.005 (-0.004, 0.015), adjusted P-Value = 5.02e-02	876
AST	0.002 (-0.007, 0.011), adjusted P-Value = 3.65e-01	0.000 (-0.002, 0.003), adjusted P-Value = 8.08e-01	0.003 (-0.007, 0.014), adjusted P-Value = 2.64e-01	462	0.002 (-0.003, 0.007), adjusted P-Value = 1.15e-01	0.002 (-0.003, 0.006), adjusted P-Value = 1.41e-01	0.000 (-0.001, 0.002), adjusted P-Value = 6.21e-01	1495	0.000 (-0.001, 0.002), adjusted P-Value = 4.93e-01	0.003 (-0.002, 0.008), adjusted P-Value = 1.03e-02	0.002 (-0.002, 0.005), adjusted P-Value = 7.28e-02	2247	0.000 (-0.003, 0.003), adjusted P-Value = 8.95e-01	0.002 (-0.011, 0.015), adjusted P-Value = 5.63e-01	0.031 (-0.016, 0.078), adjusted P-Value = 1.70e-02	206	0.002 (-0.004, 0.008), adjusted P-Value = 2.15e-01	0.004 (-0.004, 0.013), adjusted P-Value = 8.03e-02	0.002 (-0.004, 0.009), adjusted P-Value = 1.83e-01	895
Alb	0.045 (0.008, 0.083), adjusted P-Value = 6.83e-06	0.060 (0.018, 0.103), adjusted P-Value = 1.59e-07	0.103 (0.050, 0.156), adjusted P-Value = 1.38e-12	462	0.064 (0.036, 0.093), adjusted P-Value = 4.57e-18	0.054 (0.028, 0.080), adjusted P-Value = 3.90e-15	0.084 (0.053, 0.116), adjusted P-Value = 8.48e-24	1140	0.044 (0.019, 0.070), adjusted P-Value = 6.82e-11	0.070 (0.039, 0.102), adjusted P-Value = 6.00e-17	0.073 (0.041, 0.104), adjusted P-Value = 1.72e-17	971	0.050 (-0.027, 0.127), adjusted P-Value = 2.40e-02	0.027 (-0.031, 0.085), adjusted P-Value = 1.06e-01	0.046 (-0.028, 0.121), adjusted P-Value = 3.08e-02	114	0.016 (-0.000, 0.033), adjusted P-Value = 2.52e-04	0.063 (0.032, 0.094), adjusted P-Value = 4.13e-14	0.053 (0.024, 0.082), adjusted P-Value = 6.91e-12	895
BMI	0.302 (0.226, 0.378), adjusted P-Value = 1.87e-38	0.376 (0.301, 0.452), adjusted P-Value = 2.39e-53	0.389 (0.313, 0.464), adjusted P-Value = 3.95e-56	401	0.374 (0.334, 0.414), adjusted P-Value = 3.46e-189	0.405 (0.366, 0.445), adjusted P-Value = 5.32e-216	0.404 (0.364, 0.443), adjusted P-Value = 1.42e-214	1456	0.434 (0.400, 0.469), adjusted P-Value = 1.45e-306	0.475 (0.441, 0.508), adjusted P-Value = 0.00e+00	0.464 (0.430, 0.498), adjusted P-Value = 0.00e+00	1836	0.307 (0.067, 0.548), adjusted P-Value = 4.11e-04	0.375 (0.136, 0.615), adjusted P-Value = 3.55e-05	0.482 (0.257, 0.708), adjusted P-Value = 2.11e-07	33	0.247 (0.194, 0.300), adjusted P-Value = 9.27e-58	0.375 (0.321, 0.429), adjusted P-Value = 1.34e-104	0.285 (0.231, 0.338), adjusted P-Value = 8.46e-70	798
BNP	0.011 (-0.008, 0.030), adjusted P-Value = 3.37e-02	0.037 (0.003, 0.071), adjusted P-Value = 4.39e-05	0.064 (0.021, 0.107), adjusted P-Value = 4.01e-08	472	0.026 (0.010, 0.043), adjusted P-Value = 9.30e-10	0.031 (0.013, 0.049), adjusted P-Value = 1.84e-11	0.042 (0.022, 0.063), adjusted P-Value = 3.11e-15	1482	0.022 (0.010, 0.035), adjusted P-Value = 9.87e-12	0.029 (0.014, 0.043), adjusted P-Value = 7.96e-15	0.035 (0.020, 0.051), adjusted P-Value = 4.07e-18	2151	0.017 (-0.019, 0.053), adjusted P-Value = 9.08e-02	0.027 (-0.017, 0.072), adjusted P-Value = 2.89e-02	0.039 (-0.014, 0.093), adjusted P-Value = 7.67e-03	199	0.003 (-0.004, 0.010), adjusted P-Value = 1.58e-01	0.002 (-0.004, 0.007), adjusted P-Value = 2.86e-01	0.010 (-0.004, 0.023), adjusted P-Value = 6.71e-03	871
C1q	0.061 (0.014, 0.108), adjusted P-Value = 1.42e-06	0.076 (0.025, 0.128), adjusted P-Value = 5.06e-08	0.068 (0.019, 0.117), adjusted P-Value = 3.28e-07	387	0.037 (0.014, 0.061), adjusted P-Value = 1.46e-09	0.045 (0.019, 0.070), adjusted P-Value = 2.85e-11	0.049 (0.023, 0.076), adjusted P-Value = 2.51e-12	1002	0.014 (-0.013, 0.041), adjusted P-Value = 5.75e-02	0.046 (-0.001, 0.093), adjusted P-Value = 3.22e-04	0.062 (0.008, 0.115), adjusted P-Value = 2.32e-05	298	\	\	\	\	0.020 (-0.003, 0.044), adjusted P-Value = 1.20e-03	0.020 (-0.003, 0.043), adjusted P-Value = 1.38e-03	0.020 (-0.003, 0.043), adjusted P-Value = 1.35e-03	567
CK	0.001 (-0.004, 0.006), adjusted P-Value = 6.05e-01	0.000 (-0.000, 0.000), adjusted P-Value = 9.98e-01	0.005 (-0.008, 0.017), adjusted P-Value = 1.83e-01	471	0.002 (-0.003, 0.007), adjusted P-Value = 9.68e-02	0.009 (-0.001, 0.019), adjusted P-Value = 3.60e-04	0.021 (0.007, 0.036), adjusted P-Value = 3.51e-08	1490	0.001 (-0.002, 0.004), adjusted P-Value = 1.62e-01	0.002 (-0.002, 0.005), adjusted P-Value = 6.57e-02	0.002 (-0.002, 0.005), adjusted P-Value = 8.10e-02	2240	0.000 (-0.002, 0.002), adjusted P-Value = 9.24e-01	0.000 (-0.003, 0.004), adjusted P-Value = 8.86e-01	0.005 (-0.015, 0.025), adjusted P-Value = 3.65e-01	203	0.009 (-0.004, 0.021), adjusted P-Value = 9.58e-03	0.007 (-0.004, 0.019), adjusted P-Value = 1.62e-02	0.019 (0.001, 0.037), adjusted P-Value = 7.42e-05	895
CK-MB	0.002 (-0.006, 0.010), adjusted P-Value = 4.24e-01	0.000 (-0.003, 0.003), adjusted P-Value = 7.94e-01	0.002 (-0.006, 0.011), adjusted P-Value = 3.77e-01	473	0.001 (-0.002, 0.003), adjusted P-Value = 3.97e-01	0.000 (-0.001, 0.002), adjusted P-Value = 5.96e-01	0.003 (-0.003, 0.008), adjusted P-Value = 5.62e-02	1492	0.001 (-0.001, 0.003), adjusted P-Value = 3.03e-01	0.000 (-0.000, 0.000), adjusted P-Value = 9.32e-01	0.003 (-0.001, 0.008), adjusted P-Value = 8.87e-03	2241	0.000 (-0.003, 0.003), adjusted P-Value = 8.95e-01	0.019 (-0.018, 0.056), adjusted P-Value = 7.08e-02	0.002 (-0.011, 0.016), adjusted P-Value = 5.56e-01	203	\	\	\	\
Cl	0.011 (-0.008, 0.031), adjusted P-Value = 3.25e-02	0.023 (-0.004, 0.051), adjusted P-Value = 1.80e-03	0.020 (-0.006, 0.045), adjusted P-Value = 3.98e-03	462	0.000 (-0.002, 0.002), adjusted P-Value = 5.63e-01	0.002 (-0.003, 0.006), adjusted P-Value = 1.65e-01	0.000 (-0.001, 0.002), adjusted P-Value = 6.32e-01	1474	0.000 (-0.001, 0.002), adjusted P-Value = 4.93e-01	0.007 (-0.000, 0.014), adjusted P-Value = 2.70e-04	0.001 (-0.002, 0.003), adjusted P-Value = 2.13e-01	2141	\	\	\	\	\	\	\	\
Cr	0.026 (-0.003, 0.055), adjusted P-Value = 9.34e-04	0.036 (0.002, 0.070), adjusted P-Value = 7.12e-05	0.044 (0.007, 0.082), adjusted P-Value = 8.88e-06	462	0.016 (0.003, 0.028), adjusted P-Value = 2.97e-06	0.024 (0.008, 0.040), adjusted P-Value = 4.33e-09	0.023 (0.007, 0.038), adjusted P-Value = 1.31e-08	1490	0.023 (0.010, 0.035), adjusted P-Value = 2.60e-12	0.029 (0.015, 0.043), adjusted P-Value = 1.36e-15	0.028 (0.014, 0.042), adjusted P-Value = 3.63e-15	2244	0.028 (-0.061, 0.117), adjusted P-Value = 3.20e-01	0.126 (-0.044, 0.295), adjusted P-Value = 1.94e-02	0.062 (-0.066, 0.189), adjusted P-Value = 1.21e-01	46	0.120 (0.080, 0.161), adjusted P-Value = 1.53e-27	0.166 (0.121, 0.212), adjusted P-Value = 9.57e-40	0.186 (0.140, 0.233), adjusted P-Value = 1.86e-45	895
D-Bil	0.045 (0.007, 0.082), adjusted P-Value = 7.94e-06	0.046 (0.008, 0.084), adjusted P-Value = 5.99e-06	0.078 (0.030, 0.125), adjusted P-Value = 1.56e-09	462	0.022 (0.007, 0.037), adjusted P-Value = 2.79e-08	0.033 (0.015, 0.052), adjusted P-Value = 2.60e-12	0.037 (0.018, 0.057), adjusted P-Value = 1.27e-13	1492	0.009 (0.001, 0.017), adjusted P-Value = 1.27e-05	0.012 (0.003, 0.021), adjusted P-Value = 4.69e-07	0.016 (0.005, 0.026), adjusted P-Value = 6.50e-09	2245	0.005 (-0.014, 0.023), adjusted P-Value = 3.96e-01	0.012 (-0.018, 0.041), adjusted P-Value = 1.63e-01	0.035 (-0.015, 0.084), adjusted P-Value = 1.19e-02	204	0.012 (-0.002, 0.026), adjusted P-Value = 1.93e-03	0.009 (-0.003, 0.022), adjusted P-Value = 7.36e-03	0.005 (-0.004, 0.014), adjusted P-Value = 5.11e-02	895
D-Dimer	0.022 (-0.005, 0.048), adjusted P-Value = 2.19e-03	0.020 (-0.005, 0.045), adjusted P-Value = 3.88e-03	0.036 (0.003, 0.070), adjusted P-Value = 5.87e-05	471	0.017 (0.004, 0.031), adjusted P-Value = 6.82e-07	0.030 (0.012, 0.047), adjusted P-Value = 5.38e-11	0.026 (0.010, 0.042), adjusted P-Value = 1.29e-09	1495	0.012 (0.003, 0.022), adjusted P-Value = 3.59e-07	0.017 (0.006, 0.028), adjusted P-Value = 1.30e-09	0.024 (0.011, 0.036), adjusted P-Value = 6.68e-13	2237	\	\	\	\	\	\	\	\
FBG	0.002 (-0.006, 0.009), adjusted P-Value = 4.33e-01	0.001 (-0.006, 0.009), adjusted P-Value = 4.69e-01	0.037 (0.003, 0.071), adjusted P-Value = 4.76e-05	471	\	\	\	\	\	\	\	\	\	\	\	\	0.001 (-0.003, 0.005), adjusted P-Value = 4.18e-01	0.008 (-0.004, 0.020), adjusted P-Value = 1.49e-02	0.008 (-0.004, 0.020), adjusted P-Value = 1.40e-02	869
FFA	0.003 (-0.008, 0.015), adjusted P-Value = 3.24e-01	0.043 (0.003, 0.083), adjusted P-Value = 6.84e-05	0.040 (0.001, 0.079), adjusted P-Value = 1.30e-04	387	0.012 (-0.002, 0.025), adjusted P-Value = 9.79e-04	0.034 (0.012, 0.056), adjusted P-Value = 8.61e-09	0.061 (0.032, 0.090), adjusted P-Value = 2.17e-15	1013	0.004 (-0.004, 0.013), adjusted P-Value = 8.29e-02	0.010 (-0.003, 0.023), adjusted P-Value = 5.62e-03	0.002 (-0.004, 0.008), adjusted P-Value = 2.41e-01	875	0.043 (-0.037, 0.124), adjusted P-Value = 6.53e-02	0.055 (-0.034, 0.145), adjusted P-Value = 3.51e-02	0.147 (0.015, 0.279), adjusted P-Value = 1.89e-04	91	\	\	\	\
FT3	0.002 (-0.007, 0.010), adjusted P-Value = 4.95e-01	0.037 (-0.001, 0.076), adjusted P-Value = 3.48e-04	0.063 (0.014, 0.111), adjusted P-Value = 2.12e-06	365	0.024 (0.008, 0.040), adjusted P-Value = 4.31e-09	0.035 (0.016, 0.054), adjusted P-Value = 7.54e-13	0.032 (0.014, 0.050), adjusted P-Value = 1.14e-11	1489	0.011 (0.002, 0.019), adjusted P-Value = 2.67e-06	0.017 (0.006, 0.028), adjusted P-Value = 1.61e-09	0.017 (0.006, 0.028), adjusted P-Value = 1.38e-09	2234	0.004 (-0.014, 0.022), adjusted P-Value = 4.24e-01	0.033 (-0.015, 0.081), adjusted P-Value = 1.43e-02	0.078 (0.007, 0.149), adjusted P-Value = 7.42e-05	204	0.000 (-0.002, 0.003), adjusted P-Value = 6.64e-01	0.029 (0.007, 0.052), adjusted P-Value = 7.31e-07	0.058 (0.027, 0.088), adjusted P-Value = 1.14e-12	876
FT4	0.000 (-0.002, 0.002), adjusted P-Value = 8.63e-01	0.000 (-0.003, 0.004), adjusted P-Value = 8.04e-01	0.002 (-0.007, 0.010), adjusted P-Value = 4.93e-01	365	0.002 (-0.003, 0.006), adjusted P-Value = 1.61e-01	0.000 (-0.000, 0.001), adjusted P-Value = 8.77e-01	0.003 (-0.003, 0.009), adjusted P-Value = 3.63e-02	1489	0.000 (-0.001, 0.001), adjusted P-Value = 6.64e-01	0.000 (-0.000, 0.001), adjusted P-Value = 8.08e-01	0.000 (-0.001, 0.001), adjusted P-Value = 8.07e-01	2234	0.009 (-0.017, 0.035), adjusted P-Value = 2.21e-01	0.000 (-0.003, 0.004), adjusted P-Value = 8.86e-01	0.000 (-0.001, 0.001), adjusted P-Value = 9.78e-01	204	0.014 (-0.002, 0.029), adjusted P-Value = 9.06e-04	0.000 (-0.001, 0.001), adjusted P-Value = 8.51e-01	0.000 (-0.001, 0.002), adjusted P-Value = 7.91e-01	876
GGT	0.001 (-0.005, 0.008), adjusted P-Value = 5.01e-01	0.032 (0.000, 0.064), adjusted P-Value = 1.86e-04	0.024 (-0.004, 0.053), adjusted P-Value = 1.30e-03	462	0.000 (-0.000, 0.000), adjusted P-Value = 9.76e-01	0.030 (0.010, 0.050), adjusted P-Value = 6.48e-09	0.042 (0.019, 0.065), adjusted P-Value = 6.01e-12	1152	0.000 (-0.002, 0.003), adjusted P-Value = 5.63e-01	0.023 (0.005, 0.042), adjusted P-Value = 2.10e-06	0.034 (0.012, 0.057), adjusted P-Value = 6.58e-09	1012	0.055 (-0.025, 0.135), adjusted P-Value = 1.61e-02	0.026 (-0.031, 0.083), adjusted P-Value = 1.09e-01	0.001 (-0.008, 0.009), adjusted P-Value = 8.46e-01	116	0.000 (-0.001, 0.001), adjusted P-Value = 8.51e-01	0.043 (0.015, 0.071), adjusted P-Value = 8.61e-09	0.068 (0.034, 0.103), adjusted P-Value = 1.30e-13	790
Glu	0.012 (-0.008, 0.031), adjusted P-Value = 3.05e-02	0.037 (0.003, 0.072), adjusted P-Value = 4.91e-05	0.061 (0.018, 0.103), adjusted P-Value = 1.36e-07	464	0.006 (-0.002, 0.014), adjusted P-Value = 4.11e-03	0.047 (0.026, 0.068), adjusted P-Value = 4.77e-17	0.047 (0.026, 0.068), adjusted P-Value = 5.24e-17	1496	0.013 (0.004, 0.023), adjusted P-Value = 1.17e-07	0.017 (0.007, 0.028), adjusted P-Value = 9.30e-10	0.027 (0.014, 0.041), adjusted P-Value = 7.89e-15	2247	0.002 (-0.009, 0.012), adjusted P-Value = 6.30e-01	0.000 (-0.005, 0.005), adjusted P-Value = 8.30e-01	0.012 (-0.018, 0.041), adjusted P-Value = 1.61e-01	206	0.010 (-0.003, 0.023), adjusted P-Value = 5.29e-03	0.031 (0.008, 0.054), adjusted P-Value = 2.64e-07	0.037 (0.012, 0.062), adjusted P-Value = 1.39e-08	894
HCT	0.323 (0.247, 0.398), adjusted P-Value = 8.83e-43	0.368 (0.292, 0.443), adjusted P-Value = 4.68e-52	0.378 (0.303, 0.453), adjusted P-Value = 2.43e-54	406	0.186 (0.150, 0.223), adjusted P-Value = 3.94e-75	0.222 (0.184, 0.260), adjusted P-Value = 1.42e-93	0.225 (0.187, 0.263), adjusted P-Value = 5.22e-95	1493	0.249 (0.217, 0.280), adjusted P-Value = 2.54e-162	0.253 (0.221, 0.285), adjusted P-Value = 8.25e-166	0.294 (0.261, 0.326), adjusted P-Value = 3.32e-203	2245	0.305 (0.200, 0.410), adjusted P-Value = 1.73e-20	0.324 (0.218, 0.429), adjusted P-Value = 3.05e-22	0.348 (0.243, 0.454), adjusted P-Value = 1.05e-24	206	0.034 (0.011, 0.058), adjusted P-Value = 5.06e-08	0.217 (0.169, 0.266), adjusted P-Value = 9.84e-55	0.135 (0.093, 0.177), adjusted P-Value = 3.39e-31	893
HDLC	0.195 (0.131, 0.260), adjusted P-Value = 6.90e-26	0.200 (0.135, 0.265), adjusted P-Value = 1.28e-26	0.214 (0.147, 0.280), adjusted P-Value = 7.70e-29	473	0.199 (0.162, 0.236), adjusted P-Value = 1.72e-81	0.184 (0.148, 0.220), adjusted P-Value = 8.87e-74	0.189 (0.152, 0.225), adjusted P-Value = 2.75e-76	1491	0.167 (0.139, 0.196), adjusted P-Value = 7.69e-99	0.156 (0.128, 0.184), adjusted P-Value = 3.51e-91	0.181 (0.151, 0.210), adjusted P-Value = 2.24e-108	2244	0.171 (0.077, 0.266), adjusted P-Value = 3.75e-10	0.161 (0.068, 0.254), adjusted P-Value = 1.61e-09	0.201 (0.102, 0.299), adjusted P-Value = 4.21e-12	204	0.091 (0.055, 0.128), adjusted P-Value = 2.12e-20	0.097 (0.060, 0.135), adjusted P-Value = 7.55e-22	0.117 (0.077, 0.157), adjusted P-Value = 1.28e-26	891
Hb	0.368 (0.293, 0.444), adjusted P-Value = 3.68e-52	0.408 (0.334, 0.483), adjusted P-Value = 1.45e-61	0.405 (0.331, 0.480), adjusted P-Value = 8.87e-61	406	0.279 (0.240, 0.319), adjusted P-Value = 1.71e-126	0.320 (0.281, 0.360), adjusted P-Value = 1.69e-153	0.341 (0.301, 0.381), adjusted P-Value = 2.79e-168	1493	0.272 (0.240, 0.304), adjusted P-Value = 2.76e-183	0.302 (0.270, 0.335), adjusted P-Value = 5.39e-212	0.325 (0.293, 0.357), adjusted P-Value = 2.58e-235	2245	0.313 (0.207, 0.418), adjusted P-Value = 3.71e-21	0.341 (0.236, 0.447), adjusted P-Value = 5.77e-24	0.380 (0.275, 0.485), adjusted P-Value = 3.33e-28	206	0.178 (0.112, 0.244), adjusted P-Value = 1.94e-21	0.252 (0.181, 0.324), adjusted P-Value = 6.26e-33	0.276 (0.204, 0.349), adjusted P-Value = 4.21e-37	437
HbA1C%	0.028 (-0.002, 0.059), adjusted P-Value = 5.96e-04	0.085 (0.035, 0.135), adjusted P-Value = 3.87e-10	0.124 (0.067, 0.182), adjusted P-Value = 7.96e-15	448	0.012 (0.001, 0.023), adjusted P-Value = 6.30e-05	0.093 (0.064, 0.121), adjusted P-Value = 1.71e-33	0.148 (0.113, 0.182), adjusted P-Value = 4.23e-56	1468	0.007 (-0.000, 0.014), adjusted P-Value = 2.17e-04	0.034 (0.019, 0.049), adjusted P-Value = 5.68e-18	0.061 (0.041, 0.080), adjusted P-Value = 4.61e-32	2218	0.002 (-0.010, 0.014), adjusted P-Value = 5.88e-01	0.021 (-0.018, 0.060), adjusted P-Value = 5.72e-02	0.045 (-0.011, 0.100), adjusted P-Value = 4.02e-03	202	0.025 (-0.004, 0.054), adjusted P-Value = 1.18e-03	0.077 (0.029, 0.125), adjusted P-Value = 2.49e-09	0.069 (0.023, 0.114), adjusted P-Value = 2.09e-08	455
Hcy	0.037 (0.003, 0.071), adjusted P-Value = 5.94e-05	0.068 (0.023, 0.112), adjusted P-Value = 2.29e-08	0.120 (0.064, 0.176), adjusted P-Value = 1.13e-14	462	0.029 (0.010, 0.049), adjusted P-Value = 1.31e-08	0.050 (0.025, 0.075), adjusted P-Value = 3.66e-14	0.060 (0.033, 0.087), adjusted P-Value = 9.19e-17	1141	0.011 (-0.002, 0.024), adjusted P-Value = 1.78e-03	0.027 (0.006, 0.047), adjusted P-Value = 7.11e-07	0.030 (0.008, 0.051), adjusted P-Value = 1.33e-07	972	0.038 (-0.030, 0.106), adjusted P-Value = 5.38e-02	0.116 (0.007, 0.226), adjusted P-Value = 2.49e-04	0.118 (0.008, 0.228), adjusted P-Value = 2.23e-04	114	0.067 (0.030, 0.104), adjusted P-Value = 9.07e-12	0.096 (0.053, 0.138), adjusted P-Value = 1.04e-16	0.085 (0.045, 0.126), adjusted P-Value = 6.43e-15	685
Height	0.555 (0.490, 0.621), adjusted P-Value = 3.29e-109	0.605 (0.544, 0.666), adjusted P-Value = 1.09e-133	0.597 (0.535, 0.658), adjusted P-Value = 4.23e-129	401	0.512 (0.475, 0.548), adjusted P-Value = 0.00e+00	0.524 (0.488, 0.560), adjusted P-Value = 0.00e+00	0.539 (0.504, 0.575), adjusted P-Value = 0.00e+00	1456	0.515 (0.483, 0.547), adjusted P-Value = 0.00e+00	0.530 (0.498, 0.562), adjusted P-Value = 0.00e+00	0.539 (0.507, 0.571), adjusted P-Value = 0.00e+00	1836	0.554 (0.346, 0.762), adjusted P-Value = 1.79e-09	0.559 (0.353, 0.766), adjusted P-Value = 1.24e-09	0.581 (0.381, 0.781), adjusted P-Value = 1.92e-10	33	0.475 (0.424, 0.526), adjusted P-Value = 1.75e-157	0.538 (0.491, 0.586), adjusted P-Value = 1.62e-202	0.397 (0.343, 0.450), adjusted P-Value = 1.25e-114	798
INR	0.002 (-0.006, 0.009), adjusted P-Value = 4.69e-01	0.010 (-0.008, 0.028), adjusted P-Value = 4.68e-02	0.008 (-0.008, 0.024), adjusted P-Value = 7.53e-02	471	0.004 (-0.003, 0.010), adjusted P-Value = 2.44e-02	0.004 (-0.002, 0.011), adjusted P-Value = 2.06e-02	0.015 (0.002, 0.027), adjusted P-Value = 6.10e-06	1495	0.002 (-0.002, 0.006), adjusted P-Value = 5.48e-02	0.002 (-0.002, 0.006), adjusted P-Value = 4.49e-02	0.010 (0.002, 0.018), adjusted P-Value = 4.71e-06	2242	0.032 (-0.016, 0.079), adjusted P-Value = 1.59e-02	0.026 (-0.017, 0.069), adjusted P-Value = 3.06e-02	0.023 (-0.018, 0.065), adjusted P-Value = 4.14e-02	205	0.001 (-0.003, 0.005), adjusted P-Value = 4.43e-01	0.000 (-0.002, 0.003), adjusted P-Value = 6.16e-01	0.005 (-0.005, 0.014), adjusted P-Value = 6.16e-02	861
Isn	0.021 (-0.022, 0.065), adjusted P-Value = 8.51e-02	0.000 (-0.005, 0.006), adjusted P-Value = 8.51e-01	0.006 (-0.018, 0.030), adjusted P-Value = 3.74e-01	164	0.004 (-0.006, 0.014), adjusted P-Value = 2.05e-01	0.006 (-0.007, 0.018), adjusted P-Value = 1.04e-01	0.017 (-0.005, 0.038), adjusted P-Value = 3.85e-03	556	0.000 (-0.000, 0.000), adjusted P-Value = 9.76e-01	0.001 (-0.004, 0.007), adjusted P-Value = 4.69e-01	0.003 (-0.006, 0.011), adjusted P-Value = 2.32e-01	614	0.003 (-0.021, 0.026), adjusted P-Value = 7.14e-01	0.040 (-0.046, 0.125), adjusted P-Value = 1.22e-01	0.007 (-0.030, 0.044), adjusted P-Value = 5.51e-01	72	\	\	\	\
K	0.002 (-0.006, 0.009), adjusted P-Value = 4.56e-01	0.000 (-0.000, 0.000), adjusted P-Value = 9.81e-01	0.006 (-0.008, 0.020), adjusted P-Value = 1.40e-01	462	0.005 (-0.002, 0.012), adjusted P-Value = 1.35e-02	0.003 (-0.003, 0.008), adjusted P-Value = 7.32e-02	0.007 (-0.002, 0.016), adjusted P-Value = 2.41e-03	1478	0.000 (-0.000, 0.001), adjusted P-Value = 8.15e-01	0.000 (-0.001, 0.002), adjusted P-Value = 4.71e-01	0.000 (-0.000, 0.000), adjusted P-Value = 8.42e-01	2142	\	\	\	\	\	\	\	\
LDH	0.004 (-0.007, 0.014), adjusted P-Value = 2.49e-01	0.056 (0.015, 0.097), adjusted P-Value = 3.33e-07	0.046 (0.008, 0.083), adjusted P-Value = 5.33e-06	471	0.007 (-0.002, 0.015), adjusted P-Value = 3.08e-03	0.018 (0.005, 0.032), adjusted P-Value = 3.61e-07	0.018 (0.004, 0.031), adjusted P-Value = 5.36e-07	1490	0.008 (0.000, 0.015), adjusted P-Value = 6.26e-05	0.012 (0.003, 0.022), adjusted P-Value = 3.30e-07	0.018 (0.007, 0.029), adjusted P-Value = 4.24e-10	2239	0.000 (-0.003, 0.003), adjusted P-Value = 9.02e-01	0.000 (-0.005, 0.006), adjusted P-Value = 8.09e-01	0.000 (-0.001, 0.001), adjusted P-Value = 9.81e-01	203	0.001 (-0.004, 0.006), adjusted P-Value = 3.18e-01	0.009 (-0.003, 0.022), adjusted P-Value = 6.71e-03	0.002 (-0.004, 0.009), adjusted P-Value = 1.83e-01	895
LDLC	0.005 (-0.008, 0.017), adjusted P-Value = 1.79e-01	0.000 (-0.000, 0.001), adjusted P-Value = 9.66e-01	0.013 (-0.007, 0.034), adjusted P-Value = 1.84e-02	473	0.005 (-0.002, 0.013), adjusted P-Value = 7.16e-03	0.000 (-0.001, 0.002), adjusted P-Value = 6.21e-01	0.013 (0.001, 0.024), adjusted P-Value = 2.95e-05	1491	0.002 (-0.002, 0.005), adjusted P-Value = 7.79e-02	0.000 (-0.001, 0.001), adjusted P-Value = 6.30e-01	0.014 (0.004, 0.024), adjusted P-Value = 3.58e-08	2244	0.001 (-0.009, 0.012), adjusted P-Value = 6.43e-01	0.030 (-0.016, 0.076), adjusted P-Value = 1.99e-02	0.002 (-0.011, 0.016), adjusted P-Value = 5.53e-01	204	0.025 (0.003, 0.047), adjusted P-Value = 1.52e-05	0.028 (0.005, 0.051), adjusted P-Value = 4.40e-06	0.006 (-0.005, 0.016), adjusted P-Value = 5.43e-02	792
LPa	0.001 (-0.006, 0.009), adjusted P-Value = 5.56e-01	0.003 (-0.008, 0.014), adjusted P-Value = 3.68e-01	0.010 (-0.010, 0.029), adjusted P-Value = 8.16e-02	376	0.000 (-0.002, 0.002), adjusted P-Value = 6.53e-01	0.007 (-0.004, 0.018), adjusted P-Value = 1.57e-02	0.002 (-0.004, 0.008), adjusted P-Value = 1.94e-01	961	0.000 (-0.002, 0.003), adjusted P-Value = 6.64e-01	0.007 (-0.005, 0.018), adjusted P-Value = 2.93e-02	0.007 (-0.004, 0.018), adjusted P-Value = 2.64e-02	837	0.001 (-0.013, 0.016), adjusted P-Value = 7.84e-01	0.001 (-0.014, 0.016), adjusted P-Value = 7.81e-01	0.035 (-0.039, 0.108), adjusted P-Value = 1.07e-01	89	\	\	\	\
LYM	0.042 (0.004, 0.081), adjusted P-Value = 5.18e-05	0.033 (-0.001, 0.068), adjusted P-Value = 3.91e-04	0.111 (0.052, 0.169), adjusted P-Value = 5.18e-12	406	0.017 (0.004, 0.030), adjusted P-Value = 9.60e-07	0.029 (0.012, 0.047), adjusted P-Value = 6.40e-11	0.083 (0.056, 0.111), adjusted P-Value = 1.62e-30	1493	0.013 (0.003, 0.022), adjusted P-Value = 1.77e-07	0.023 (0.011, 0.036), adjusted P-Value = 1.16e-12	0.053 (0.035, 0.072), adjusted P-Value = 1.58e-28	2245	0.000 (-0.002, 0.003), adjusted P-Value = 9.16e-01	0.008 (-0.016, 0.031), adjusted P-Value = 2.65e-01	0.010 (-0.017, 0.038), adjusted P-Value = 1.86e-01	206	0.015 (-0.001, 0.031), adjusted P-Value = 5.36e-04	0.030 (0.008, 0.053), adjusted P-Value = 3.89e-07	0.025 (0.004, 0.045), adjusted P-Value = 5.15e-06	893
LYM%	0.016 (-0.022, 0.054), adjusted P-Value = 1.37e-01	0.005 (-0.017, 0.027), adjusted P-Value = 4.28e-01	0.087 (0.005, 0.169), adjusted P-Value = 1.72e-04	165	0.017 (0.003, 0.030), adjusted P-Value = 1.91e-06	0.030 (0.012, 0.047), adjusted P-Value = 9.94e-11	0.052 (0.029, 0.074), adjusted P-Value = 3.06e-18	1452	0.017 (0.006, 0.028), adjusted P-Value = 7.05e-09	0.011 (0.002, 0.020), adjusted P-Value = 2.57e-06	0.041 (0.024, 0.058), adjusted P-Value = 1.57e-20	2119	\	\	\	\	\	\	\	\
MCH	0.065 (0.018, 0.112), adjusted P-Value = 2.85e-07	0.063 (0.017, 0.110), adjusted P-Value = 4.41e-07	0.072 (0.023, 0.121), adjusted P-Value = 5.73e-08	406	0.004 (-0.002, 0.011), adjusted P-Value = 1.90e-02	0.011 (0.000, 0.021), adjusted P-Value = 1.37e-04	0.007 (-0.001, 0.016), adjusted P-Value = 1.73e-03	1473	0.002 (-0.002, 0.005), adjusted P-Value = 9.32e-02	0.001 (-0.002, 0.003), adjusted P-Value = 2.11e-01	0.002 (-0.002, 0.006), adjusted P-Value = 3.98e-02	2140	\	\	\	\	\	\	\	\
MCHC	0.100 (0.044, 0.155), adjusted P-Value = 8.47e-11	0.119 (0.059, 0.179), adjusted P-Value = 6.40e-13	0.132 (0.070, 0.194), adjusted P-Value = 2.18e-14	406	0.006 (-0.002, 0.014), adjusted P-Value = 6.00e-03	0.004 (-0.003, 0.011), adjusted P-Value = 1.96e-02	0.008 (-0.001, 0.017), adjusted P-Value = 1.62e-03	1455	0.004 (-0.001, 0.009), adjusted P-Value = 6.12e-03	0.003 (-0.002, 0.007), adjusted P-Value = 2.40e-02	0.006 (-0.001, 0.013), adjusted P-Value = 5.26e-04	2123	\	\	\	\	\	\	\	\
MCV	0.015 (-0.009, 0.039), adjusted P-Value = 1.95e-02	0.020 (-0.007, 0.047), adjusted P-Value = 7.57e-03	0.028 (-0.004, 0.059), adjusted P-Value = 1.36e-03	406	0.003 (-0.003, 0.008), adjusted P-Value = 6.02e-02	0.009 (-0.001, 0.019), adjusted P-Value = 5.63e-04	0.006 (-0.002, 0.014), adjusted P-Value = 6.06e-03	1474	0.009 (0.001, 0.016), adjusted P-Value = 3.89e-05	0.006 (-0.001, 0.012), adjusted P-Value = 7.24e-04	0.007 (0.000, 0.015), adjusted P-Value = 1.42e-04	2141	\	\	\	\	\	\	\	\
MPV	0.000 (-0.003, 0.004), adjusted P-Value = 7.68e-01	0.000 (-0.003, 0.004), adjusted P-Value = 7.49e-01	0.016 (-0.009, 0.040), adjusted P-Value = 1.85e-02	405	0.001 (-0.002, 0.004), adjusted P-Value = 3.41e-01	0.001 (-0.002, 0.004), adjusted P-Value = 3.10e-01	0.005 (-0.002, 0.012), adjusted P-Value = 1.00e-02	1493	0.000 (-0.001, 0.001), adjusted P-Value = 5.51e-01	0.000 (-0.001, 0.002), adjusted P-Value = 4.28e-01	0.002 (-0.002, 0.005), adjusted P-Value = 8.54e-02	2245	0.000 (-0.004, 0.004), adjusted P-Value = 8.65e-01	0.008 (-0.016, 0.032), adjusted P-Value = 2.51e-01	0.000 (-0.004, 0.005), adjusted P-Value = 8.50e-01	206	0.008 (-0.004, 0.020), adjusted P-Value = 1.15e-02	0.000 (-0.001, 0.001), adjusted P-Value = 9.02e-01	0.001 (-0.003, 0.004), adjusted P-Value = 5.47e-01	892
NE	0.000 (-0.003, 0.004), adjusted P-Value = 7.47e-01	0.013 (-0.009, 0.035), adjusted P-Value = 3.51e-02	0.011 (-0.009, 0.032), adjusted P-Value = 4.80e-02	406	0.001 (-0.002, 0.003), adjusted P-Value = 3.64e-01	0.002 (-0.003, 0.006), adjusted P-Value = 1.20e-01	0.034 (0.015, 0.052), adjusted P-Value = 2.51e-12	1493	0.000 (-0.000, 0.000), adjusted P-Value = 9.61e-01	0.003 (-0.002, 0.008), adjusted P-Value = 1.07e-02	0.017 (0.006, 0.028), adjusted P-Value = 1.28e-09	2245	0.014 (-0.018, 0.046), adjusted P-Value = 1.20e-01	0.023 (-0.018, 0.065), adjusted P-Value = 4.09e-02	0.016 (-0.018, 0.049), adjusted P-Value = 1.01e-01	206	0.001 (-0.003, 0.004), adjusted P-Value = 4.96e-01	0.010 (-0.003, 0.024), adjusted P-Value = 4.02e-03	0.021 (0.002, 0.040), adjusted P-Value = 2.76e-05	893
NE%	0.001 (-0.005, 0.006), adjusted P-Value = 6.24e-01	0.011 (-0.009, 0.032), adjusted P-Value = 4.90e-02	0.040 (0.002, 0.078), adjusted P-Value = 8.14e-05	406	0.022 (0.007, 0.038), adjusted P-Value = 2.41e-08	0.022 (0.007, 0.037), adjusted P-Value = 3.26e-08	0.049 (0.027, 0.071), adjusted P-Value = 3.90e-17	1452	0.009 (0.001, 0.017), adjusted P-Value = 4.22e-05	0.012 (0.003, 0.021), adjusted P-Value = 1.06e-06	0.027 (0.013, 0.041), adjusted P-Value = 6.14e-14	2119	\	\	\	\	\	\	\	\
Na	0.016 (-0.035, 0.067), adjusted P-Value = 2.91e-01	0.026 (-0.038, 0.089), adjusted P-Value = 1.74e-01	0.052 (-0.037, 0.141), adjusted P-Value = 4.53e-02	88	0.002 (-0.003, 0.006), adjusted P-Value = 1.33e-01	0.003 (-0.003, 0.009), adjusted P-Value = 5.44e-02	0.006 (-0.002, 0.015), adjusted P-Value = 3.50e-03	1480	0.000 (-0.001, 0.002), adjusted P-Value = 4.84e-01	0.001 (-0.002, 0.005), adjusted P-Value = 1.12e-01	0.001 (-0.002, 0.004), adjusted P-Value = 1.69e-01	2144	\	\	\	\	\	\	\	\
PCT	0.016 (-0.009, 0.040), adjusted P-Value = 1.77e-02	0.008 (-0.009, 0.025), adjusted P-Value = 1.01e-01	0.026 (-0.005, 0.057), adjusted P-Value = 1.86e-03	405	0.023 (0.007, 0.038), adjusted P-Value = 1.33e-08	0.074 (0.048, 0.100), adjusted P-Value = 8.37e-27	0.077 (0.050, 0.103), adjusted P-Value = 6.91e-28	1492	0.036 (0.020, 0.051), adjusted P-Value = 4.72e-19	0.037 (0.021, 0.052), adjusted P-Value = 1.56e-19	0.065 (0.045, 0.085), adjusted P-Value = 9.07e-35	2245	0.002 (-0.009, 0.013), adjusted P-Value = 6.26e-01	0.033 (-0.015, 0.082), adjusted P-Value = 1.35e-02	0.056 (-0.005, 0.118), adjusted P-Value = 9.44e-04	206	0.006 (-0.004, 0.017), adjusted P-Value = 2.88e-02	0.030 (0.008, 0.052), adjusted P-Value = 4.01e-07	0.062 (0.031, 0.094), adjusted P-Value = 6.14e-14	892
PLT	0.007 (-0.009, 0.023), adjusted P-Value = 1.36e-01	0.019 (-0.008, 0.046), adjusted P-Value = 8.21e-03	0.035 (-0.000, 0.071), adjusted P-Value = 2.56e-04	406	0.040 (0.020, 0.060), adjusted P-Value = 1.67e-14	0.037 (0.018, 0.056), adjusted P-Value = 2.07e-13	0.045 (0.024, 0.066), adjusted P-Value = 3.02e-16	1492	0.024 (0.011, 0.037), adjusted P-Value = 3.25e-13	0.041 (0.025, 0.058), adjusted P-Value = 4.61e-22	0.043 (0.026, 0.060), adjusted P-Value = 4.75e-23	2245	0.007 (-0.016, 0.031), adjusted P-Value = 2.68e-01	0.032 (-0.015, 0.080), adjusted P-Value = 1.50e-02	0.028 (-0.017, 0.073), adjusted P-Value = 2.40e-02	206	0.020 (0.001, 0.038), adjusted P-Value = 4.83e-05	0.021 (0.002, 0.039), adjusted P-Value = 3.37e-05	0.029 (0.007, 0.051), adjusted P-Value = 7.03e-07	893
RBC	0.231 (0.159, 0.304), adjusted P-Value = 2.00e-27	0.276 (0.202, 0.351), adjusted P-Value = 1.52e-34	0.285 (0.210, 0.360), adjusted P-Value = 5.44e-36	406	0.217 (0.180, 0.255), adjusted P-Value = 6.14e-91	0.224 (0.186, 0.261), adjusted P-Value = 3.04e-94	0.253 (0.215, 0.292), adjusted P-Value = 7.20e-111	1493	0.201 (0.170, 0.231), adjusted P-Value = 3.09e-123	0.207 (0.176, 0.237), adjusted P-Value = 8.33e-128	0.241 (0.210, 0.273), adjusted P-Value = 6.78e-156	2245	0.202 (0.104, 0.300), adjusted P-Value = 2.59e-12	0.203 (0.105, 0.302), adjusted P-Value = 2.22e-12	0.215 (0.115, 0.315), adjusted P-Value = 3.23e-13	206	0.032 (0.009, 0.055), adjusted P-Value = 1.51e-07	0.087 (0.051, 0.123), adjusted P-Value = 2.01e-19	0.157 (0.113, 0.202), adjusted P-Value = 3.92e-37	893
T-Bil	0.037 (0.003, 0.071), adjusted P-Value = 5.42e-05	0.047 (0.009, 0.085), adjusted P-Value = 4.51e-06	0.060 (0.017, 0.102), adjusted P-Value = 1.73e-07	462	0.016 (0.003, 0.028), adjusted P-Value = 2.62e-06	0.023 (0.008, 0.038), adjusted P-Value = 1.10e-08	0.035 (0.016, 0.053), adjusted P-Value = 9.51e-13	1492	0.019 (0.008, 0.031), adjusted P-Value = 9.78e-11	0.014 (0.004, 0.024), adjusted P-Value = 3.20e-08	0.030 (0.016, 0.044), adjusted P-Value = 5.65e-16	2245	0.002 (-0.010, 0.013), adjusted P-Value = 6.07e-01	0.003 (-0.013, 0.020), adjusted P-Value = 4.68e-01	0.019 (-0.018, 0.056), adjusted P-Value = 6.97e-02	205	0.017 (-0.000, 0.034), adjusted P-Value = 2.00e-04	0.025 (0.004, 0.045), adjusted P-Value = 4.33e-06	0.027 (0.006, 0.049), adjusted P-Value = 1.34e-06	895
T3	0.012 (-0.010, 0.034), adjusted P-Value = 5.32e-02	0.003 (-0.009, 0.015), adjusted P-Value = 3.26e-01	0.011 (-0.011, 0.032), adjusted P-Value = 6.90e-02	365	0.000 (-0.002, 0.003), adjusted P-Value = 4.68e-01	0.001 (-0.002, 0.003), adjusted P-Value = 4.29e-01	0.000 (-0.001, 0.001), adjusted P-Value = 7.30e-01	1489	0.000 (-0.000, 0.000), adjusted P-Value = 9.79e-01	0.000 (-0.000, 0.000), adjusted P-Value = 8.61e-01	0.002 (-0.002, 0.006), adjusted P-Value = 4.29e-02	2234	0.019 (-0.018, 0.056), adjusted P-Value = 7.22e-02	0.000 (-0.003, 0.003), adjusted P-Value = 9.00e-01	0.005 (-0.014, 0.024), adjusted P-Value = 3.79e-01	204	0.000 (-0.002, 0.003), adjusted P-Value = 5.94e-01	0.002 (-0.004, 0.007), adjusted P-Value = 2.67e-01	0.000 (-0.002, 0.003), adjusted P-Value = 6.73e-01	876
T4	0.002 (-0.007, 0.010), adjusted P-Value = 5.18e-01	0.007 (-0.010, 0.024), adjusted P-Value = 1.45e-01	0.007 (-0.010, 0.025), adjusted P-Value = 1.40e-01	365	0.003 (-0.003, 0.008), adjusted P-Value = 7.50e-02	0.009 (-0.001, 0.019), adjusted P-Value = 3.42e-04	0.023 (0.007, 0.038), adjusted P-Value = 1.28e-08	1489	0.000 (-0.001, 0.002), adjusted P-Value = 4.16e-01	0.007 (0.000, 0.014), adjusted P-Value = 1.44e-04	0.009 (0.001, 0.017), adjusted P-Value = 1.10e-05	2234	0.010 (-0.017, 0.037), adjusted P-Value = 1.98e-01	0.018 (-0.018, 0.054), adjusted P-Value = 7.68e-02	0.035 (-0.015, 0.085), adjusted P-Value = 1.10e-02	204	0.000 (-0.001, 0.001), adjusted P-Value = 8.31e-01	0.009 (-0.004, 0.021), adjusted P-Value = 9.57e-03	0.004 (-0.004, 0.012), adjusted P-Value = 9.10e-02	876
TC	0.020 (-0.005, 0.045), adjusted P-Value = 3.79e-03	0.031 (-0.000, 0.062), adjusted P-Value = 2.24e-04	0.043 (0.006, 0.079), adjusted P-Value = 1.10e-05	473	0.016 (0.003, 0.029), adjusted P-Value = 1.97e-06	0.016 (0.003, 0.029), adjusted P-Value = 1.68e-06	0.029 (0.012, 0.047), adjusted P-Value = 6.61e-11	1491	0.015 (0.005, 0.025), adjusted P-Value = 1.58e-08	0.008 (0.001, 0.016), adjusted P-Value = 4.22e-05	0.031 (0.017, 0.045), adjusted P-Value = 1.26e-16	2244	0.002 (-0.010, 0.014), adjusted P-Value = 5.96e-01	0.010 (-0.017, 0.037), adjusted P-Value = 2.04e-01	0.026 (-0.017, 0.070), adjusted P-Value = 2.99e-02	204	0.021 (0.002, 0.039), adjusted P-Value = 3.40e-05	0.011 (-0.003, 0.025), adjusted P-Value = 2.41e-03	0.007 (-0.004, 0.017), adjusted P-Value = 2.40e-02	894
TG	0.003 (-0.007, 0.012), adjusted P-Value = 3.33e-01	0.053 (0.013, 0.093), adjusted P-Value = 7.31e-07	0.057 (0.016, 0.098), adjusted P-Value = 2.51e-07	473	0.022 (0.007, 0.036), adjusted P-Value = 2.96e-08	0.079 (0.053, 0.106), adjusted P-Value = 6.58e-29	0.109 (0.079, 0.139), adjusted P-Value = 1.44e-40	1491	0.017 (0.006, 0.028), adjusted P-Value = 1.17e-09	0.061 (0.041, 0.080), adjusted P-Value = 1.30e-32	0.066 (0.046, 0.087), adjusted P-Value = 1.18e-35	2244	0.009 (-0.017, 0.034), adjusted P-Value = 2.37e-01	0.051 (-0.008, 0.110), adjusted P-Value = 1.87e-03	0.092 (0.016, 0.168), adjusted P-Value = 1.40e-05	204	0.005 (-0.004, 0.014), adjusted P-Value = 5.14e-02	0.041 (0.015, 0.066), adjusted P-Value = 2.67e-09	0.049 (0.021, 0.077), adjusted P-Value = 4.39e-11	894
TP	0.004 (-0.008, 0.015), adjusted P-Value = 2.39e-01	0.016 (-0.007, 0.039), adjusted P-Value = 9.90e-03	0.023 (-0.004, 0.051), adjusted P-Value = 1.68e-03	462	0.012 (0.001, 0.023), adjusted P-Value = 6.18e-05	0.025 (0.009, 0.042), adjusted P-Value = 1.38e-09	0.042 (0.021, 0.062), adjusted P-Value = 3.92e-15	1495	0.011 (0.002, 0.020), adjusted P-Value = 1.04e-06	0.010 (0.002, 0.019), adjusted P-Value = 3.92e-06	0.026 (0.012, 0.039), adjusted P-Value = 6.60e-14	2247	0.001 (-0.007, 0.008), adjusted P-Value = 7.45e-01	0.003 (-0.012, 0.019), adjusted P-Value = 4.84e-01	0.010 (-0.017, 0.037), adjusted P-Value = 1.93e-01	206	\	\	\	\
TSH	0.003 (-0.008, 0.014), adjusted P-Value = 3.69e-01	0.001 (-0.006, 0.008), adjusted P-Value = 5.94e-01	0.002 (-0.007, 0.011), adjusted P-Value = 4.67e-01	365	0.000 (-0.001, 0.001), adjusted P-Value = 6.85e-01	0.001 (-0.002, 0.004), adjusted P-Value = 2.62e-01	0.003 (-0.003, 0.008), adjusted P-Value = 7.60e-02	1489	0.001 (-0.002, 0.004), adjusted P-Value = 1.52e-01	0.000 (-0.000, 0.000), adjusted P-Value = 9.16e-01	0.002 (-0.002, 0.005), adjusted P-Value = 9.10e-02	2234	0.001 (-0.007, 0.009), adjusted P-Value = 7.19e-01	0.001 (-0.009, 0.011), adjusted P-Value = 6.64e-01	0.003 (-0.012, 0.018), adjusted P-Value = 5.10e-01	204	0.001 (-0.003, 0.004), adjusted P-Value = 5.68e-01	0.000 (-0.000, 0.000), adjusted P-Value = 9.76e-01	0.000 (-0.001, 0.001), adjusted P-Value = 8.08e-01	876
UA	0.113 (0.058, 0.168), adjusted P-Value = 8.76e-14	0.120 (0.063, 0.176), adjusted P-Value = 1.23e-14	0.118 (0.062, 0.174), adjusted P-Value = 1.79e-14	462	0.149 (0.115, 0.183), adjusted P-Value = 7.21e-58	0.142 (0.109, 0.175), adjusted P-Value = 1.04e-54	0.138 (0.105, 0.171), adjusted P-Value = 8.92e-53	1496	0.115 (0.090, 0.140), adjusted P-Value = 1.79e-64	0.100 (0.076, 0.124), adjusted P-Value = 2.08e-55	0.111 (0.086, 0.136), adjusted P-Value = 5.65e-62	2247	0.082 (0.010, 0.154), adjusted P-Value = 4.22e-05	0.144 (0.055, 0.232), adjusted P-Value = 1.53e-08	0.131 (0.045, 0.217), adjusted P-Value = 8.50e-08	206	0.081 (0.046, 0.116), adjusted P-Value = 3.77e-18	0.084 (0.049, 0.120), adjusted P-Value = 6.91e-19	0.089 (0.052, 0.125), adjusted P-Value = 7.31e-20	895
Urea	0.013 (-0.008, 0.034), adjusted P-Value = 2.04e-02	0.014 (-0.008, 0.035), adjusted P-Value = 1.94e-02	0.018 (-0.006, 0.043), adjusted P-Value = 6.22e-03	462	0.012 (0.001, 0.023), adjusted P-Value = 4.59e-05	0.034 (0.016, 0.052), adjusted P-Value = 1.64e-12	0.024 (0.008, 0.040), adjusted P-Value = 4.00e-09	1496	0.023 (0.011, 0.036), adjusted P-Value = 1.29e-12	0.036 (0.021, 0.052), adjusted P-Value = 2.69e-19	0.036 (0.020, 0.051), adjusted P-Value = 4.65e-19	2247	0.056 (-0.005, 0.118), adjusted P-Value = 9.16e-04	0.072 (0.004, 0.140), adjusted P-Value = 1.52e-04	0.053 (-0.007, 0.112), adjusted P-Value = 1.43e-03	206	0.028 (0.006, 0.049), adjusted P-Value = 1.11e-06	0.036 (0.012, 0.060), adjusted P-Value = 2.42e-08	0.037 (0.013, 0.062), adjusted P-Value = 1.18e-08	895
WBC	0.004 (-0.009, 0.017), adjusted P-Value = 2.31e-01	0.033 (-0.002, 0.067), adjusted P-Value = 4.39e-04	0.028 (-0.004, 0.061), adjusted P-Value = 1.12e-03	406	0.003 (-0.003, 0.008), adjusted P-Value = 6.70e-02	0.038 (0.019, 0.057), adjusted P-Value = 7.47e-14	0.044 (0.023, 0.064), adjusted P-Value = 7.88e-16	1493	0.001 (-0.002, 0.005), adjusted P-Value = 9.49e-02	0.025 (0.012, 0.038), adjusted P-Value = 8.99e-14	0.030 (0.015, 0.044), adjusted P-Value = 7.08e-16	2245	0.003 (-0.011, 0.017), adjusted P-Value = 5.25e-01	0.019 (-0.018, 0.055), adjusted P-Value = 7.13e-02	0.012 (-0.018, 0.042), adjusted P-Value = 1.48e-01	206	0.006 (-0.004, 0.016), adjusted P-Value = 3.26e-02	0.026 (0.005, 0.047), adjusted P-Value = 2.67e-06	0.019 (0.001, 0.038), adjusted P-Value = 5.59e-05	893
Weight	0.258 (0.185, 0.331), adjusted P-Value = 3.20e-32	0.284 (0.210, 0.358), adjusted P-Value = 1.46e-36	0.278 (0.204, 0.352), adjusted P-Value = 1.36e-35	415	0.273 (0.233, 0.312), adjusted P-Value = 1.84e-121	0.299 (0.260, 0.339), adjusted P-Value = 3.53e-138	0.297 (0.257, 0.337), adjusted P-Value = 1.69e-136	1481	0.501 (0.468, 0.534), adjusted P-Value = 0.00e+00	0.523 (0.491, 0.555), adjusted P-Value = 0.00e+00	0.503 (0.470, 0.535), adjusted P-Value = 0.00e+00	1841	0.439 (0.206, 0.672), adjusted P-Value = 2.12e-06	0.431 (0.197, 0.665), adjusted P-Value = 3.02e-06	0.412 (0.176, 0.649), adjusted P-Value = 7.23e-06	33	0.385 (0.331, 0.439), adjusted P-Value = 2.18e-109	0.468 (0.416, 0.519), adjusted P-Value = 3.84e-153	0.458 (0.406, 0.510), adjusted P-Value = 2.07e-147	800
eGFR(CKD-EPI)	0.244 (0.175, 0.313), adjusted P-Value = 2.60e-33	0.261 (0.192, 0.331), adjusted P-Value = 2.22e-36	0.289 (0.218, 0.359), adjusted P-Value = 1.43e-41	462	0.189 (0.152, 0.225), adjusted P-Value = 3.16e-76	0.193 (0.156, 0.229), adjusted P-Value = 4.61e-78	0.208 (0.170, 0.245), adjusted P-Value = 9.60e-86	1490	0.165 (0.136, 0.194), adjusted P-Value = 3.73e-97	0.159 (0.131, 0.188), adjusted P-Value = 3.00e-93	0.184 (0.154, 0.214), adjusted P-Value = 9.25e-111	2244	0.368 (0.159, 0.578), adjusted P-Value = 1.04e-06	0.317 (0.106, 0.527), adjusted P-Value = 1.45e-05	0.417 (0.211, 0.622), adjusted P-Value = 5.92e-08	46	0.037 (0.012, 0.061), adjusted P-Value = 1.55e-08	0.179 (0.133, 0.225), adjusted P-Value = 3.04e-43	0.184 (0.137, 0.230), adjusted P-Value = 1.05e-44	895
hs-CRP	0.001 (-0.004, 0.006), adjusted P-Value = 6.15e-01	0.002 (-0.006, 0.010), adjusted P-Value = 4.22e-01	0.011 (-0.008, 0.029), adjusted P-Value = 4.27e-02	455	0.000 (-0.002, 0.003), adjusted P-Value = 5.63e-01	0.000 (-0.000, 0.000), adjusted P-Value = 9.81e-01	0.014 (-0.000, 0.028), adjusted P-Value = 1.58e-04	1121	0.001 (-0.003, 0.005), adjusted P-Value = 3.63e-01	0.002 (-0.004, 0.007), adjusted P-Value = 2.54e-01	0.011 (-0.002, 0.024), adjusted P-Value = 2.24e-03	964	0.008 (-0.025, 0.041), adjusted P-Value = 3.97e-01	0.000 (-0.008, 0.009), adjusted P-Value = 8.50e-01	0.011 (-0.027, 0.048), adjusted P-Value = 3.30e-01	114	0.001 (-0.005, 0.007), adjusted P-Value = 4.56e-01	0.000 (-0.001, 0.001), adjusted P-Value = 9.20e-01	0.001 (-0.003, 0.004), adjusted P-Value = 6.43e-01	569
hsTnI	0.000 (-0.001, 0.001), adjusted P-Value = 9.46e-01	0.002 (-0.006, 0.009), adjusted P-Value = 4.50e-01	0.006 (-0.008, 0.019), adjusted P-Value = 1.37e-01	473	0.001 (-0.002, 0.004), adjusted P-Value = 3.40e-01	0.000 (-0.002, 0.002), adjusted P-Value = 5.32e-01	0.001 (-0.002, 0.005), adjusted P-Value = 2.35e-01	1476	0.001 (-0.002, 0.004), adjusted P-Value = 1.28e-01	0.001 (-0.002, 0.004), adjusted P-Value = 1.42e-01	0.001 (-0.002, 0.004), adjusted P-Value = 1.39e-01	2231	0.000 (-0.002, 0.002), adjusted P-Value = 9.48e-01	0.000 (-0.006, 0.007), adjusted P-Value = 8.40e-01	0.002 (-0.012, 0.016), adjusted P-Value = 6.63e-01	144	\	\	\	\
nonHDL	0.007 (-0.008, 0.022), adjusted P-Value = 9.44e-02	0.025 (-0.003, 0.053), adjusted P-Value = 9.54e-04	0.038 (0.004, 0.072), adjusted P-Value = 3.80e-05	473	0.005 (-0.002, 0.013), adjusted P-Value = 8.86e-03	0.020 (0.005, 0.035), adjusted P-Value = 1.52e-07	0.036 (0.016, 0.055), adjusted P-Value = 1.29e-12	1444	0.002 (-0.002, 0.005), adjusted P-Value = 8.71e-02	0.015 (0.004, 0.025), adjusted P-Value = 5.83e-08	0.023 (0.010, 0.035), adjusted P-Value = 1.28e-11	2103	\	\	\	\	\	\	\	\
sdLDL	0.004 (-0.009, 0.017), adjusted P-Value = 2.67e-01	0.034 (-0.002, 0.070), adjusted P-Value = 4.22e-04	0.037 (-0.001, 0.074), adjusted P-Value = 2.67e-04	387	0.008 (-0.003, 0.019), adjusted P-Value = 8.86e-03	0.058 (0.029, 0.086), adjusted P-Value = 1.54e-14	0.042 (0.018, 0.067), adjusted P-Value = 8.93e-11	1014	0.007 (-0.004, 0.018), adjusted P-Value = 2.37e-02	0.016 (-0.001, 0.032), adjusted P-Value = 3.88e-04	0.043 (0.016, 0.070), adjusted P-Value = 1.38e-09	875	0.000 (-0.000, 0.000), adjusted P-Value = 9.94e-01	0.061 (-0.033, 0.154), adjusted P-Value = 2.62e-02	0.058 (-0.034, 0.150), adjusted P-Value = 2.99e-02	91	\	\	\	\
Note: \ represents the missing measurement for specific biomarker in external cohorts.

## Sheet: Supplementary Table 6
Relative importance and residual corrleation of facial prediction score adjusted by common factors
	Relative Importance						Adjusted R² (95% CI)	Pearson r	Spearman r	N	Adjusted P value
Biomarker Name	FaceFound	Age	Sex	Height	Weight	BMI
ALP	0.508074	0.0326013	0.181603	0.176751	0.0731299	0.0278407	0.00585533	0.0765201	0.056293	1124	0.0230327
Alb	0.453593	0.0740502	0.00742828	0.142594	0.15639	0.165944	0.0131717	0.114768	0.111246	1114	<0.001
BNP	0.716651	0.169515	0.0045926	0.0161419	0.0477898	0.045309	0.00700707	0.0837083	-0.143195	1442	0.00384606
D-Bil	0.572987	0.0416334	0.136535	0.106676	0.0867461	0.055422	0.0110955	0.105335	0.0775191	1450	<0.001
FFA	0.637421	0.0108999	0.173909	0.101178	0.0350068	0.0415851	0.0185507	0.136201	0.114613	1000	<0.001
GGT	0.678883	0.108502	0.0571495	0.037734	0.0714087	0.0463235	0.00626755	0.0791678	0.00649035	1124	0.0184315
Glu	0.954125	0.0322157	0.000682609	0.00237936	0.00476877	0.00582871	0.0359232	0.189534	0.159548	1454	<0.001
HCT	0.438375	0.0717317	0.231482	0.106219	0.109724	0.0424685	0.0123886	0.111304	0.138566	1451	<0.001
HDLC	0.458808	0.0689044	0.140669	0.0879373	0.157774	0.0859071	0.0207825	0.144161	0.0980432	1450	<0.001
Hb	0.733332	0.0260792	0.141045	0.0480408	0.0383948	0.0131076	0.0269218	0.164079	0.163662	1451	<0.001
HbA1C	0.950326	0.0158701	0.00750614	0.00737949	0.0076805	0.0112377	0.124409	0.352716	0.32234	1429	<0.001
Hcy	0.820097	0.00476527	0.106329	0.0326875	0.0278897	0.00823135	0.0124783	0.111706	-0.0102378	1115	<0.001
INR	0.543074	0.100556	0.138374	0.0813046	0.0702574	0.0664339	0.00797156	0.0892836	0.0959272	1454	0.00187603
LYM	0.636316	0.123152	0.0455847	0.0131498	0.0768154	0.104982	0.0228729	0.151238	0.161753	1451	<0.001
NE	0.791464	0.00598914	0.104434	0.024163	0.0370853	0.0368646	0.014281	0.119503	0.113519	1451	<0.001
NE%	0.743348	0.072943	0.0735283	0.0137222	0.0495427	0.0469161	0.0161987	0.127274	0.130653	1413	<0.001
Na	0.442686	0.0174864	0.358101	0.101784	0.0608828	0.0190601	0.00523751	0.0723707	0.083783	1440	0.01458
PCT	0.527166	0.197166	0.147866	0.0726902	0.0238898	0.0312226	0.00587003	0.0766161	0.0773486	1450	0.00886344
RBC	0.431982	0.130822	0.176783	0.0873242	0.116264	0.0568246	0.0153459	0.123878	0.116759	1451	<0.001
T-Bil	0.630741	0.00460201	0.141068	0.103761	0.0769361	0.0428931	0.00821926	0.0906601	0.0555131	1450	0.00165191
TG	0.758774	0.0899132	0.0106718	0.0133404	0.0667223	0.0605781	0.0504754	0.224667	0.106084	1450	<0.001
TP	0.739123	0.0134263	0.12134	0.0597221	0.0321358	0.0342528	0.00971153	0.0985471	0.0911243	1453	<0.001
WBC	0.687978	0.0523932	0.0433315	0.0223602	0.0889349	0.105002	0.0162155	0.12734	0.130536	1451	<0.001
hs-CRP	0.131216	0.0071605	0.0396628	0.102634	0.246347	0.47298	0.0102277	0.101132	0.120993	1095	0.00218411
nonHDL	0.768382	0.0439405	0.0708207	0.0244237	0.0408015	0.0516318	0.0200948	0.141756	0.121233	1406	<0.001
sdLDL	0.7711	0.0335104	0.02279	0.0121338	0.0678581	0.0926074	0.0200755	0.141688	0.127835	1001	<0.001

## Sheet: Supplementary Table 7
Predictive performance of polygenic risk scores (PRS) and face prediction in the AZ-GEV cohort
Biomarker Name	Predictor	N	R² (95% CI)	Adjusted P value
ALP	Face	40	0.001 (-0.013, 0.015)	0.924347
ALP	PGS000670	40	0.001 (-0.021, 0.024)	0.877903
ALP	PGS000815	40	0.001 (-0.014, 0.015)	0.924347
ALP	PGS001939	40	0.023 (-0.063, 0.110)	0.508291
ALP	PGS002157	40	0.005 (-0.035, 0.044)	0.790662
ALP	PGS003521	40	0.011 (-0.050, 0.072)	0.674569
ALP	PGS004711	40	0.003 (-0.030, 0.037)	0.82
ALP	PGS004712	40	0.005 (-0.037, 0.048)	0.773768
ALP	PGS004713	40	0.003 (-0.030, 0.037)	0.82
ALP	PGS004714	40	0.005 (-0.037, 0.048)	0.773768
ALT	Face	111	0.102 (-0.003, 0.208)	0.00352249
ALT	PGS000668	111	0.001 (-0.010, 0.011)	0.842587
ALT	PGS000816	111	0.003 (-0.016, 0.021)	0.744245
ALT	PGS001940	111	0.001 (-0.011, 0.014)	0.82
ALT	PGS002158	111	0.002 (-0.014, 0.018)	0.773768
ALT	PGS002732	111	0.006 (-0.022, 0.033)	0.601343
ALT	PGS003342	111	0.008 (-0.025, 0.042)	0.505191
ALT	PGS003351	111	0.008 (-0.025, 0.042)	0.505191
ALT	PGS004329	111	0.015 (-0.029, 0.058)	0.359802
ALT	PGS004715	111	0.000 (-0.000, 0.000)	0.996208
ALT	PGS004716	111	0.000 (-0.005, 0.005)	0.928069
ALT	PGS004717	111	0.010 (-0.026, 0.046)	0.464433
ALT	PGS004718	111	0.021 (-0.031, 0.073)	0.261396
AST	Face	111	0.001 (-0.009, 0.010)	0.861215
AST	PGS000673	111	0.013 (-0.028, 0.054)	0.39251
AST	PGS001941	111	0.004 (-0.020, 0.028)	0.653937
AST	PGS002159	111	0.005 (-0.021, 0.031)	0.621082
AST	PGS003343	111	0.001 (-0.012, 0.014)	0.816157
AST	PGS003352	111	0.001 (-0.012, 0.014)	0.816157
AST	PGS003523	111	0.003 (-0.016, 0.021)	0.744245
AST	PGS004330	111	0.005 (-0.021, 0.032)	0.610756
AST	PGS004719	111	0.003 (-0.018, 0.025)	0.701234
AST	PGS004721	111	0.000 (-0.008, 0.008)	0.884827
AST	PGS004722	111	0.008 (-0.024, 0.040)	0.528869
Alb	Face	38	0.025 (-0.066, 0.116)	0.505892
Alb	PGS000669	38	0.000 (-0.012, 0.013)	0.928069
Alb	PGS001886	38	0.002 (-0.022, 0.026)	0.87583
Alb	PGS002099	38	0.010 (-0.048, 0.068)	0.711892
Alb	PGS004328	38	0.001 (-0.016, 0.018)	0.915389
Alb	PGS004707	38	0.002 (-0.026, 0.031)	0.847683
Alb	PGS004708	38	0.003 (-0.028, 0.033)	0.841701
Alb	PGS004709	38	0.003 (-0.028, 0.033)	0.841701
Alb	PGS004710	38	0.003 (-0.028, 0.033)	0.841701
BMI	Face	66	0.354 (0.174, 0.533)	<0.001
BMI	PGS000027	66	0.037 (-0.050, 0.124)	0.246711
BMI	PGS000034	66	0.004 (-0.026, 0.034)	0.74605
BMI	PGS000320	66	0.054 (-0.049, 0.157)	0.143614
BMI	PGS000717	66	0.017 (-0.043, 0.078)	0.451445
BMI	PGS000770	66	0.003 (-0.024, 0.031)	0.773768
BMI	PGS000841	66	0.000 (-0.009, 0.010)	0.915389
BMI	PGS000921	66	0.109 (-0.028, 0.246)	0.0245645
BMI	PGS001228	66	0.034 (-0.049, 0.117)	0.272355
BMI	PGS001943	66	0.067 (-0.046, 0.180)	0.0968962
BMI	PGS002161	66	0.068 (-0.045, 0.182)	0.0941344
BMI	PGS002313	66	0.066 (-0.046, 0.179)	0.0987706
BMI	PGS002360	66	0.088 (-0.038, 0.214)	0.0474337
BMI	PGS002385	66	0.089 (-0.038, 0.216)	0.0455033
BMI	PGS002434	66	0.011 (-0.037, 0.058)	0.583786
BMI	PGS002483	66	0.010 (-0.037, 0.057)	0.589084
BMI	PGS002532	66	0.044 (-0.050, 0.138)	0.196613
BMI	PGS002581	66	0.023 (-0.046, 0.091)	0.38041
BMI	PGS002630	66	0.014 (-0.041, 0.069)	0.505191
BMI	PGS002679	66	0.060 (-0.048, 0.167)	0.121109
BMI	PGS002840	66	0.041 (-0.050, 0.132)	0.216165
BMI	PGS002841	66	0.034 (-0.049, 0.118)	0.272355
BMI	PGS002842	66	0.058 (-0.048, 0.164)	0.127671
BMI	PGS002843	66	0.061 (-0.047, 0.169)	0.118711
BMI	PGS002844	66	0.040 (-0.050, 0.129)	0.227047
BMI	PGS002845	66	0.047 (-0.049, 0.144)	0.180949
BMI	PGS002846	66	0.011 (-0.038, 0.060)	0.566404
BMI	PGS002847	66	0.036 (-0.049, 0.122)	0.25124
BMI	PGS002848	66	0.055 (-0.048, 0.159)	0.137784
BMI	PGS002849	66	0.037 (-0.049, 0.123)	0.249283
BMI	PGS002850	66	0.040 (-0.050, 0.129)	0.227745
BMI	PGS002851	66	0.025 (-0.047, 0.096)	0.359802
BMI	PGS002852	66	0.012 (-0.039, 0.063)	0.544659
BMI	PGS002853	66	0.074 (-0.044, 0.191)	0.0776903
BMI	PGS002854	66	0.043 (-0.050, 0.136)	0.203023
BMI	PGS002855	66	0.047 (-0.049, 0.144)	0.179482
BMI	PGS002856	66	0.017 (-0.043, 0.077)	0.453757
BMI	PGS002857	66	0.023 (-0.046, 0.093)	0.371479
BMI	PGS002858	66	0.060 (-0.048, 0.167)	0.121246
BMI	PGS002859	66	0.027 (-0.048, 0.101)	0.346094
BMI	PGS003124	66	0.017 (-0.043, 0.078)	0.451445
BMI	PGS003126	66	0.020 (-0.045, 0.085)	0.419747
BMI	PGS003127	66	0.000 (-0.002, 0.002)	0.984409
BMI	PGS003128	66	0.001 (-0.014, 0.016)	0.863452
BMI	PGS003129	66	0.070 (-0.045, 0.186)	0.0867558
BMI	PGS003130	66	0.007 (-0.032, 0.047)	0.653937
BMI	PGS003131	66	0.003 (-0.021, 0.027)	0.795063
BMI	PGS003133	66	0.002 (-0.020, 0.024)	0.810335
BMI	PGS003462	66	0.045 (-0.050, 0.139)	0.194742
BMI	PGS003525	66	0.044 (-0.050, 0.138)	0.196215
BMI	PGS003842	66	0.014 (-0.040, 0.067)	0.516798
BMI	PGS003843	66	0.000 (-0.006, 0.007)	0.935344
BMI	PGS003844	66	0.015 (-0.041, 0.071)	0.496278
BMI	PGS003845	66	0.009 (-0.035, 0.054)	0.610422
BMI	PGS003847	66	0.000 (-0.005, 0.006)	0.944179
BMI	PGS003848	66	0.004 (-0.027, 0.036)	0.738979
BMI	PGS003884	66	0.002 (-0.019, 0.023)	0.82
BMI	PGS003885	66	0.005 (-0.028, 0.039)	0.715335
BMI	PGS003886	66	0.050 (-0.049, 0.149)	0.163549
BMI	PGS003887	66	0.038 (-0.050, 0.126)	0.237935
BMI	PGS003897	66	0.060 (-0.048, 0.167)	0.121109
BMI	PGS003980	66	0.038 (-0.050, 0.126)	0.237319
BMI	PGS003996	66	0.012 (-0.038, 0.061)	0.559198
BMI	PGS004022	66	0.013 (-0.040, 0.066)	0.528869
BMI	PGS004037	66	0.059 (-0.048, 0.166)	0.124359
BMI	PGS004050	66	0.018 (-0.043, 0.079)	0.448687
BMI	PGS004066	66	0.056 (-0.048, 0.160)	0.136857
BMI	PGS004080	66	0.036 (-0.049, 0.121)	0.255346
BMI	PGS004096	66	0.041 (-0.050, 0.132)	0.215547
BMI	PGS004104	66	0.001 (-0.015, 0.017)	0.859542
BMI	PGS004120	66	0.054 (-0.049, 0.156)	0.145669
BMI	PGS004134	66	0.027 (-0.048, 0.102)	0.33829
BMI	PGS004150	66	0.050 (-0.049, 0.148)	0.165207
BMI	PGS004216	66	0.078 (-0.042, 0.198)	0.0675817
BMI	PGS004217	66	0.078 (-0.042, 0.198)	0.0675817
BMI	PGS004218	66	0.079 (-0.042, 0.201)	0.0648973
BMI	PGS004219	66	0.081 (-0.041, 0.203)	0.0612144
BMI	PGS004220	66	0.096 (-0.035, 0.227)	0.0376845
BMI	PGS004319	66	0.004 (-0.024, 0.031)	0.773768
BMI	PGS004378	66	0.002 (-0.017, 0.021)	0.834543
BMI	PGS004409	66	0.002 (-0.017, 0.020)	0.840963
BMI	PGS004609	66	0.000 (-0.003, 0.003)	0.968476
BMI	PGS004610	66	0.020 (-0.045, 0.085)	0.419804
BMI	PGS004733	66	0.007 (-0.031, 0.044)	0.675075
BMI	PGS004734	66	0.094 (-0.036, 0.224)	0.0399962
BMI	PGS004735	66	0.064 (-0.047, 0.175)	0.105353
BMI	PGS004736	66	0.006 (-0.030, 0.041)	0.701234
BMI	PGS004864	66	0.040 (-0.050, 0.129)	0.227745
BMI	PGS004900	66	0.001 (-0.015, 0.017)	0.856734
BMI	PGS004902	66	0.024 (-0.047, 0.094)	0.36646
BMI	PGS004982	66	0.000 (-0.006, 0.007)	0.933767
BMI	PGS004984	66	0.006 (-0.030, 0.042)	0.699832
BMI	PGS004985	66	0.000 (-0.005, 0.005)	0.953293
BMI	PGS004986	66	0.014 (-0.041, 0.069)	0.505191
BMI	PGS004987	66	0.005 (-0.028, 0.039)	0.7145
BMI	PGS004988	66	0.036 (-0.049, 0.121)	0.255346
BMI	PGS004989	66	0.018 (-0.043, 0.078)	0.451445
BMI	PGS004990	66	0.004 (-0.026, 0.035)	0.741939
BMI	PGS004991	66	0.003 (-0.024, 0.030)	0.773768
BMI	PGS004992	66	0.016 (-0.042, 0.075)	0.468571
BMI	PGS004993	66	0.023 (-0.046, 0.092)	0.377036
Cr	Face	111	0.244 (0.106, 0.381)	<0.001
Cr	PGS000678	111	0.016 (-0.030, 0.062)	0.337781
Cr	PGS002163	111	0.005 (-0.021, 0.031)	0.620343
Cr	PGS003526	111	0.003 (-0.017, 0.024)	0.7145
Cr	PGS004334	111	0.000 (-0.007, 0.007)	0.903589
Cr	PGS004747	111	0.015 (-0.030, 0.061)	0.348713
Cr	PGS004749	111	0.020 (-0.031, 0.071)	0.272864
Cr	PGS004750	111	0.022 (-0.031, 0.076)	0.246711
GGT	Face	40	0.125 (-0.054, 0.305)	0.0666307
GGT	PGS000683	40	0.001 (-0.014, 0.015)	0.923926
GGT	PGS001964	40	0.000 (-0.012, 0.013)	0.928069
GGT	PGS002182	40	0.004 (-0.034, 0.043)	0.795421
GGT	PGS003344	40	0.015 (-0.055, 0.084)	0.620058
GGT	PGS003543	40	0.003 (-0.029, 0.035)	0.829315
GGT	PGS004336	40	0.072 (-0.072, 0.217)	0.194847
Glu	Face	111	0.040 (-0.031, 0.111)	0.0985459
Glu	PGS000684	111	0.002 (-0.014, 0.018)	0.773768
Glu	PGS001952	111	0.007 (-0.024, 0.038)	0.554695
Glu	PGS002170	111	0.001 (-0.012, 0.015)	0.809027
Glu	PGS002328	111	0.003 (-0.017, 0.023)	0.727632
Glu	PGS002400	111	0.012 (-0.028, 0.053)	0.40471
Glu	PGS002449	111	0.014 (-0.029, 0.058)	0.363127
Glu	PGS002498	111	0.005 (-0.021, 0.032)	0.610756
Glu	PGS002547	111	0.038 (-0.031, 0.108)	0.106229
Glu	PGS002596	111	0.003 (-0.016, 0.022)	0.735252
Glu	PGS002645	111	0.004 (-0.019, 0.027)	0.675075
Glu	PGS002694	111	0.001 (-0.012, 0.015)	0.806562
Glu	PGS002934	111	0.009 (-0.025, 0.043)	0.498623
Glu	PGS002935	111	0.006 (-0.022, 0.034)	0.597897
Glu	PGS002936	111	0.008 (-0.024, 0.039)	0.529619
Glu	PGS002937	111	0.015 (-0.029, 0.060)	0.354562
Glu	PGS002938	111	0.001 (-0.009, 0.010)	0.864323
Glu	PGS002939	111	0.002 (-0.013, 0.017)	0.790547
Glu	PGS002940	111	0.002 (-0.014, 0.018)	0.776306
Glu	PGS002941	111	0.003 (-0.017, 0.022)	0.732536
Glu	PGS002942	111	0.010 (-0.026, 0.045)	0.469743
Glu	PGS002943	111	0.004 (-0.020, 0.029)	0.649752
HCT	Face	111	0.410 (0.271, 0.549)	<0.001
HCT	PGS000092	111	0.020 (-0.031, 0.070)	0.28359
HCT	PGS000167	111	0.028 (-0.032, 0.087)	0.186236
HCT	PGS001225	111	0.005 (-0.020, 0.030)	0.639857
HCT	PGS001925	111	0.014 (-0.029, 0.058)	0.363584
HCT	PGS002141	111	0.010 (-0.026, 0.045)	0.469743
HCT	PGS003467	111	0.057 (-0.026, 0.139)	0.0414272
HCT	PGS003511	111	0.024 (-0.032, 0.080)	0.217714
HCT	PGS003927	111	0.011 (-0.027, 0.049)	0.437694
HCT	PGS004348	111	0.008 (-0.025, 0.042)	0.506868
HCT	PGS004771	111	0.016 (-0.030, 0.062)	0.33619
HCT	PGS004772	111	0.023 (-0.032, 0.078)	0.229542
HCT	PGS004773	111	0.014 (-0.029, 0.056)	0.376736
HCT	PGS004774	111	0.023 (-0.032, 0.078)	0.229542
HDLC	Face	111	0.319 (0.178, 0.461)	<0.001
HDLC	PGS000060	111	0.010 (-0.026, 0.046)	0.460206
HDLC	PGS000064	111	0.030 (-0.032, 0.093)	0.160343
HDLC	PGS000309	111	0.019 (-0.031, 0.070)	0.286306
HDLC	PGS000660	111	0.058 (-0.026, 0.141)	0.0399962
HDLC	PGS000686	111	0.057 (-0.026, 0.140)	0.0401122
HDLC	PGS000825	111	0.027 (-0.032, 0.085)	0.194742
HDLC	PGS000845	111	0.002 (-0.014, 0.017)	0.778462
HDLC	PGS001954	111	0.048 (-0.029, 0.125)	0.0646595
HDLC	PGS002172	111	0.044 (-0.030, 0.118)	0.0796889
HDLC	PGS002284	111	0.002 (-0.015, 0.019)	0.773768
HDLC	PGS002329	111	0.057 (-0.026, 0.140)	0.0401122
HDLC	PGS002366	111	0.068 (-0.021, 0.158)	0.0234069
HDLC	PGS002401	111	0.027 (-0.032, 0.085)	0.194742
HDLC	PGS002450	111	0.039 (-0.031, 0.109)	0.102909
HDLC	PGS002499	111	0.035 (-0.031, 0.102)	0.124908
HDLC	PGS002548	111	0.028 (-0.032, 0.088)	0.183364
HDLC	PGS002646	111	0.092 (-0.009, 0.193)	0.00604916
HDLC	PGS002695	111	0.067 (-0.022, 0.156)	0.0246662
HDLC	PGS002781	111	0.092 (-0.009, 0.193)	0.00604916
HDLC	PGS002954	111	0.039 (-0.031, 0.109)	0.104873
HDLC	PGS002955	111	0.031 (-0.032, 0.094)	0.151682
HDLC	PGS002956	111	0.034 (-0.031, 0.100)	0.1316
HDLC	PGS002957	111	0.057 (-0.026, 0.140)	0.0402327
HDLC	PGS002959	111	0.034 (-0.032, 0.099)	0.136734
HDLC	PGS002960	111	0.040 (-0.031, 0.110)	0.101259
HDLC	PGS002961	111	0.030 (-0.032, 0.092)	0.16492
HDLC	PGS002962	111	0.055 (-0.027, 0.136)	0.0447342
HDLC	PGS002963	111	0.054 (-0.027, 0.134)	0.0475669
HDLC	PGS003338	111	0.121 (0.009, 0.234)	0.00128563
HDLC	PGS003347	111	0.126 (0.012, 0.240)	<0.001
HDLC	PGS003534	111	0.039 (-0.031, 0.109)	0.103678
HDLC	PGS003767	111	0.031 (-0.032, 0.094)	0.151682
HDLC	PGS003768	111	0.021 (-0.031, 0.074)	0.255346
HDLC	PGS003769	111	0.065 (-0.023, 0.153)	0.0263269
HDLC	PGS003771	111	0.001 (-0.011, 0.013)	0.834543
HDLC	PGS003772	111	0.043 (-0.030, 0.116)	0.0844857
HDLC	PGS003773	111	0.068 (-0.022, 0.157)	0.0238433
HDLC	PGS003774	111	0.019 (-0.031, 0.069)	0.287714
HDLC	PGS003775	111	0.025 (-0.032, 0.081)	0.215547
HDLC	PGS003776	111	0.001 (-0.012, 0.015)	0.806562
HDLC	PGS003778	111	0.065 (-0.023, 0.153)	0.0263269
HDLC	PGS003781	111	0.002 (-0.014, 0.018)	0.773815
HDLC	PGS003782	111	0.057 (-0.026, 0.139)	0.0414272
HDLC	PGS003783	111	0.056 (-0.026, 0.139)	0.0420771
HDLC	PGS003856	111	0.014 (-0.029, 0.058)	0.363127
HDLC	PGS003875	111	0.030 (-0.032, 0.091)	0.165603
HDLC	PGS003877	111	0.028 (-0.032, 0.088)	0.182213
HDLC	PGS003878	111	0.078 (-0.017, 0.173)	0.0129941
HDLC	PGS003879	111	0.058 (-0.025, 0.141)	0.0393113
HDLC	PGS003880	111	0.009 (-0.025, 0.042)	0.503748
HDLC	PGS003986	111	0.008 (-0.024, 0.040)	0.529619
HDLC	PGS004002	111	0.011 (-0.027, 0.049)	0.437694
HDLC	PGS004028	111	0.004 (-0.020, 0.029)	0.653937
HDLC	PGS004043	111	0.010 (-0.027, 0.048)	0.451445
HDLC	PGS004056	111	0.000 (-0.004, 0.004)	0.929085
HDLC	PGS004072	111	0.003 (-0.017, 0.024)	0.7145
HDLC	PGS004086	111	0.013 (-0.028, 0.054)	0.394756
HDLC	PGS004100	111	0.011 (-0.027, 0.049)	0.437694
HDLC	PGS004110	111	0.016 (-0.030, 0.061)	0.346173
HDLC	PGS004126	111	0.001 (-0.012, 0.015)	0.806562
HDLC	PGS004140	111	0.004 (-0.019, 0.028)	0.661261
HDLC	PGS004156	111	0.006 (-0.022, 0.033)	0.600667
HDLC	PGS004622	111	0.026 (-0.032, 0.084)	0.197268
HDLC	PGS004623	111	0.027 (-0.032, 0.085)	0.194742
HDLC	PGS004624	111	0.065 (-0.023, 0.152)	0.0266833
HDLC	PGS004625	111	0.042 (-0.030, 0.113)	0.0924942
HDLC	PGS004626	111	0.034 (-0.031, 0.100)	0.131103
HDLC	PGS004627	111	0.060 (-0.025, 0.145)	0.0347561
HDLC	PGS004628	111	0.041 (-0.030, 0.112)	0.0960962
HDLC	PGS004629	111	0.079 (-0.016, 0.174)	0.0125771
HDLC	PGS004630	111	0.113 (0.003, 0.222)	0.00199242
HDLC	PGS004631	111	0.072 (-0.019, 0.164)	0.0181702
HDLC	PGS004632	111	0.017 (-0.030, 0.065)	0.317065
HDLC	PGS004633	111	0.015 (-0.029, 0.058)	0.359802
HDLC	PGS004634	111	0.072 (-0.020, 0.163)	0.0185821
HDLC	PGS004635	111	0.087 (-0.012, 0.186)	0.00808728
HDLC	PGS004636	111	0.051 (-0.028, 0.130)	0.054639
HDLC	PGS004775	111	0.046 (-0.029, 0.121)	0.073428
HDLC	PGS004776	111	0.098 (-0.006, 0.202)	0.00442297
HDLC	PGS004777	111	0.049 (-0.028, 0.126)	0.0625882
HDLC	PGS004778	111	0.098 (-0.006, 0.202)	0.00442297
HDLC	PGS004914	111	0.032 (-0.032, 0.095)	0.147603
HDLC	PGS004932	111	0.048 (-0.029, 0.124)	0.0663267
Hb	Face	111	0.409 (0.270, 0.548)	<0.001
Hb	PGS000093	111	0.019 (-0.031, 0.068)	0.297348
Hb	PGS000168	111	0.015 (-0.029, 0.060)	0.351832
Hb	PGS001400	111	0.003 (-0.018, 0.025)	0.701234
Hb	PGS001926	111	0.022 (-0.031, 0.075)	0.251751
Hb	PGS002142	111	0.013 (-0.029, 0.056)	0.378344
Hb	PGS003425	111	0.018 (-0.030, 0.066)	0.312096
Hb	PGS003512	111	0.019 (-0.031, 0.069)	0.290336
Hb	PGS003926	111	0.000 (-0.003, 0.003)	0.945408
Hb	PGS004347	111	0.005 (-0.021, 0.032)	0.610756
Hb	PGS004769	111	0.014 (-0.029, 0.058)	0.3614
Hb	PGS004770	111	0.015 (-0.029, 0.059)	0.355588
Hb	PGS004956	111	0.011 (-0.027, 0.050)	0.429687
Hb	PGS004958	111	0.055 (-0.026, 0.137)	0.0432542
Hb	PGS004959	111	0.041 (-0.030, 0.113)	0.0946053
Hb	PGS004960	111	0.045 (-0.029, 0.120)	0.0745123
Hb	PGS004961	111	0.045 (-0.030, 0.119)	0.0767166
Hb	PGS004962	111	0.063 (-0.023, 0.150)	0.0289197
Hb	PGS004963	111	0.064 (-0.023, 0.150)	0.0285464
Hb	PGS004964	111	0.068 (-0.021, 0.158)	0.0234069
Hb	PGS004965	111	0.066 (-0.022, 0.154)	0.025957
Hb	PGS004966	111	0.041 (-0.030, 0.112)	0.0961184
Hb	PGS004967	111	0.056 (-0.026, 0.138)	0.0428384
Hb	PGS004968	111	0.044 (-0.030, 0.117)	0.0815195
Height	Face	66	0.465 (0.294, 0.635)	<0.001
Height	PGS000297	66	0.006 (-0.029, 0.040)	0.711644
Height	PGS000758	66	0.033 (-0.049, 0.116)	0.277261
Height	PGS001229	66	0.000 (-0.001, 0.001)	0.994908
Height	PGS001405	66	0.000 (-0.001, 0.001)	0.987269
Height	PGS001929	66	0.025 (-0.047, 0.098)	0.355588
Height	PGS002146	66	0.025 (-0.047, 0.096)	0.359802
Height	PGS002332	66	0.004 (-0.025, 0.033)	0.752128
Height	PGS002368	66	0.015 (-0.041, 0.070)	0.50009
Height	PGS002404	66	0.019 (-0.044, 0.081)	0.437694
Height	PGS002453	66	0.000 (-0.008, 0.008)	0.928069
Height	PGS002502	66	0.004 (-0.025, 0.034)	0.752128
Height	PGS002551	66	0.001 (-0.016, 0.019)	0.843274
Height	PGS002600	66	0.010 (-0.037, 0.057)	0.590156
Height	PGS002649	66	0.002 (-0.020, 0.024)	0.813039
Height	PGS002698	66	0.015 (-0.042, 0.072)	0.48541
Height	PGS002748	66	0.001 (-0.011, 0.012)	0.903589
Height	PGS002800	66	0.027 (-0.048, 0.102)	0.337781
Height	PGS002802	66	0.059 (-0.048, 0.165)	0.125404
Height	PGS002803	66	0.043 (-0.050, 0.135)	0.205106
Height	PGS002804	66	0.052 (-0.049, 0.153)	0.151682
Height	PGS002805	66	0.019 (-0.044, 0.082)	0.435813
Height	PGS002964	66	0.039 (-0.050, 0.128)	0.230978
Height	PGS002965	66	0.036 (-0.049, 0.121)	0.256789
Height	PGS002966	66	0.028 (-0.048, 0.104)	0.327022
Height	PGS002967	66	0.029 (-0.048, 0.106)	0.320844
Height	PGS002968	66	0.028 (-0.048, 0.105)	0.325904
Height	PGS002969	66	0.041 (-0.050, 0.132)	0.215547
Height	PGS002970	66	0.028 (-0.048, 0.104)	0.32877
Height	PGS002971	66	0.021 (-0.045, 0.088)	0.397898
Height	PGS002972	66	0.030 (-0.048, 0.108)	0.311203
Height	PGS002973	66	0.026 (-0.047, 0.099)	0.349346
Height	PGS002974	66	0.053 (-0.049, 0.155)	0.147794
Height	PGS002975	66	0.030 (-0.048, 0.108)	0.312096
Height	PGS002976	66	0.054 (-0.049, 0.156)	0.145738
Height	PGS002977	66	0.014 (-0.040, 0.068)	0.510482
Height	PGS002978	66	0.032 (-0.049, 0.112)	0.294646
Height	PGS002979	66	0.032 (-0.049, 0.112)	0.293039
Height	PGS002981	66	0.000 (-0.008, 0.009)	0.924347
Height	PGS002982	66	0.000 (-0.007, 0.008)	0.928484
Height	PGS002983	66	0.022 (-0.046, 0.091)	0.384627
Height	PGS002984	66	0.093 (-0.036, 0.223)	0.0405084
Height	PGS002985	66	0.038 (-0.050, 0.125)	0.239176
Height	PGS002986	66	0.025 (-0.047, 0.096)	0.359802
Height	PGS002987	66	0.009 (-0.035, 0.054)	0.60855
Height	PGS002988	66	0.064 (-0.047, 0.175)	0.105353
Height	PGS002989	66	0.025 (-0.047, 0.097)	0.359529
Height	PGS002990	66	0.003 (-0.023, 0.030)	0.773768
Height	PGS002991	66	0.000 (-0.002, 0.002)	0.9798
Height	PGS002992	66	0.001 (-0.010, 0.011)	0.912584
Height	PGS002993	66	0.010 (-0.036, 0.056)	0.59765
Height	PGS003514	66	0.025 (-0.047, 0.098)	0.355588
Height	PGS003835	66	0.011 (-0.037, 0.058)	0.584256
Height	PGS003836	66	0.002 (-0.020, 0.025)	0.806562
Height	PGS003837	66	0.003 (-0.023, 0.030)	0.773768
Height	PGS003838	66	0.000 (-0.010, 0.011)	0.915389
Height	PGS003840	66	0.007 (-0.032, 0.047)	0.653937
Height	PGS003841	66	0.000 (-0.007, 0.008)	0.929085
Height	PGS003888	66	0.008 (-0.034, 0.051)	0.62995
Height	PGS003889	66	0.007 (-0.032, 0.047)	0.65513
Height	PGS003890	66	0.081 (-0.041, 0.202)	0.0625882
Height	PGS003895	66	0.000 (-0.010, 0.011)	0.915389
Height	PGS004011	66	0.043 (-0.050, 0.137)	0.199531
Height	PGS004036	66	0.055 (-0.049, 0.158)	0.140362
Height	PGS004065	66	0.021 (-0.045, 0.087)	0.40471
Height	PGS004095	66	0.075 (-0.043, 0.193)	0.0744016
Height	PGS004119	66	0.050 (-0.049, 0.149)	0.16492
Height	PGS004149	66	0.040 (-0.050, 0.129)	0.227745
Height	PGS004211	66	0.004 (-0.026, 0.035)	0.745498
Height	PGS004212	66	0.004 (-0.025, 0.033)	0.753365
Height	PGS004213	66	0.004 (-0.026, 0.034)	0.74605
Height	PGS004214	66	0.005 (-0.029, 0.040)	0.711892
Height	PGS004215	66	0.005 (-0.028, 0.038)	0.726977
Height	PGS004407	66	0.008 (-0.034, 0.050)	0.632064
Height	PGS004682	66	0.016 (-0.042, 0.073)	0.479623
Height	PGS004684	66	0.024 (-0.046, 0.094)	0.367067
Height	PGS004685	66	0.020 (-0.045, 0.084)	0.423944
Height	PGS004779	66	0.028 (-0.048, 0.105)	0.325419
Height	PGS004780	66	0.053 (-0.049, 0.155)	0.14725
Height	PGS004782	66	0.051 (-0.049, 0.151)	0.158281
Height	PGS004995	66	0.017 (-0.043, 0.078)	0.451445
Height	PGS004996	66	0.005 (-0.027, 0.036)	0.737178
Height	PGS004997	66	0.022 (-0.046, 0.090)	0.389776
Height	PGS004998	66	0.034 (-0.049, 0.117)	0.272864
Height	PGS004999	66	0.017 (-0.043, 0.078)	0.451445
Height	PGS005000	66	0.002 (-0.017, 0.021)	0.834543
Height	PGS005001	66	0.031 (-0.049, 0.111)	0.298453
Height	PGS005003	66	0.026 (-0.047, 0.100)	0.346173
Height	PGS005004	66	0.012 (-0.039, 0.063)	0.54913
Height	PGS005005	66	0.007 (-0.031, 0.044)	0.675075
Height	PGS005006	66	0.018 (-0.043, 0.079)	0.448687
Isn	Face	30	0.000 (-0.004, 0.004)	0.980235
Isn	PGS000835	30	0.026 (-0.076, 0.128)	0.563105
LDLC	Face	111	0.001 (-0.013, 0.016)	0.800649
LDLC	PGS000061	111	0.003 (-0.017, 0.024)	0.7145
LDLC	PGS000115	111	0.000 (-0.007, 0.008)	0.889107
LDLC	PGS000310	111	0.000 (-0.005, 0.006)	0.923354
LDLC	PGS000340	111	0.006 (-0.022, 0.033)	0.601343
LDLC	PGS000661	111	0.002 (-0.014, 0.019)	0.773768
LDLC	PGS000688	111	0.093 (-0.009, 0.194)	0.00583807
LDLC	PGS000824	111	0.063 (-0.024, 0.149)	0.0299567
LDLC	PGS000886	111	0.000 (-0.005, 0.005)	0.92786
LDLC	PGS000887	111	0.017 (-0.030, 0.064)	0.323358
LDLC	PGS000888	111	0.105 (-0.002, 0.212)	0.00305295
LDLC	PGS000889	111	0.008 (-0.024, 0.040)	0.528869
LDLC	PGS000890	111	0.079 (-0.016, 0.174)	0.0126045
LDLC	PGS000891	111	0.000 (-0.006, 0.006)	0.915389
LDLC	PGS000892	111	0.055 (-0.027, 0.136)	0.0448613
LDLC	PGS000893	111	0.085 (-0.013, 0.183)	0.00923674
LDLC	PGS000894	111	0.101 (-0.004, 0.206)	0.00384199
LDLC	PGS000896	111	0.029 (-0.032, 0.089)	0.174448
LDLC	PGS001933	111	0.055 (-0.026, 0.137)	0.0432542
LDLC	PGS002150	111	0.056 (-0.026, 0.138)	0.0426068
LDLC	PGS002274	111	0.000 (-0.004, 0.004)	0.933767
LDLC	PGS002285	111	0.128 (0.013, 0.243)	<0.001
LDLC	PGS002337	111	0.079 (-0.016, 0.175)	0.0123703
LDLC	PGS002409	111	0.051 (-0.028, 0.130)	0.054639
LDLC	PGS002458	111	0.002 (-0.015, 0.019)	0.762402
LDLC	PGS002507	111	0.000 (-0.002, 0.002)	0.968476
LDLC	PGS002556	111	0.063 (-0.024, 0.149)	0.0296875
LDLC	PGS002605	111	0.061 (-0.024, 0.147)	0.0324548
LDLC	PGS002654	111	0.055 (-0.027, 0.136)	0.0447403
LDLC	PGS002703	111	0.034 (-0.031, 0.100)	0.131103
LDLC	PGS003029	111	0.048 (-0.029, 0.124)	0.0666307
LDLC	PGS003030	111	0.033 (-0.032, 0.098)	0.139889
LDLC	PGS003031	111	0.039 (-0.031, 0.109)	0.103444
LDLC	PGS003032	111	0.137 (0.019, 0.254)	<0.001
LDLC	PGS003033	111	0.023 (-0.031, 0.077)	0.239176
LDLC	PGS003034	111	0.047 (-0.029, 0.123)	0.0675817
LDLC	PGS003035	111	0.028 (-0.032, 0.088)	0.179529
LDLC	PGS003036	111	0.033 (-0.032, 0.099)	0.136887
LDLC	PGS003037	111	0.122 (0.009, 0.235)	0.00123209
LDLC	PGS003038	111	0.020 (-0.031, 0.071)	0.272864
LDLC	PGS003339	111	0.002 (-0.013, 0.016)	0.790662
LDLC	PGS003348	111	0.002 (-0.013, 0.016)	0.790662
LDLC	PGS003403	111	0.006 (-0.022, 0.033)	0.601343
LDLC	PGS003405	111	0.001 (-0.011, 0.014)	0.82
LDLC	PGS003474	111	0.062 (-0.024, 0.148)	0.0305098
LDLC	PGS003517	111	0.056 (-0.026, 0.138)	0.0422749
LDLC	PGS003784	111	0.038 (-0.031, 0.107)	0.108717
LDLC	PGS003785	111	0.010 (-0.026, 0.047)	0.456834
LDLC	PGS003786	111	0.001 (-0.009, 0.011)	0.853897
LDLC	PGS003787	111	0.027 (-0.032, 0.085)	0.194742
LDLC	PGS003788	111	0.037 (-0.031, 0.104)	0.118711
LDLC	PGS003789	111	0.043 (-0.030, 0.117)	0.0825093
LDLC	PGS003790	111	0.068 (-0.022, 0.157)	0.0237731
LDLC	PGS003792	111	0.052 (-0.027, 0.132)	0.0515609
LDLC	PGS003793	111	0.028 (-0.032, 0.087)	0.185139
LDLC	PGS003794	111	0.095 (-0.008, 0.198)	0.0051516
LDLC	PGS003795	111	0.142 (0.023, 0.261)	<0.001
LDLC	PGS003797	111	0.097 (-0.007, 0.200)	0.00467657
LDLC	PGS003798	111	0.035 (-0.031, 0.102)	0.126749
LDLC	PGS003799	111	0.108 (0.000, 0.216)	0.00264878
LDLC	PGS003855	111	0.017 (-0.030, 0.064)	0.323358
LDLC	PGS003869	111	0.013 (-0.028, 0.054)	0.394641
LDLC	PGS003870	111	0.068 (-0.022, 0.157)	0.0237731
LDLC	PGS003871	111	0.011 (-0.027, 0.049)	0.437694
LDLC	PGS003872	111	0.066 (-0.022, 0.154)	0.0258599
LDLC	PGS003873	111	0.015 (-0.029, 0.058)	0.359802
LDLC	PGS003874	111	0.034 (-0.032, 0.099)	0.13424
LDLC	PGS003974	111	0.000 (-0.002, 0.002)	0.974982
LDLC	PGS003975	111	0.005 (-0.021, 0.031)	0.62995
LDLC	PGS003976	111	0.067 (-0.022, 0.155)	0.02473
LDLC	PGS003977	111	0.001 (-0.010, 0.012)	0.840806
LDLC	PGS003978	111	0.082 (-0.015, 0.179)	0.0107224
LDLC	PGS004637	111	0.016 (-0.030, 0.061)	0.348713
LDLC	PGS004638	111	0.049 (-0.028, 0.127)	0.0612008
LDLC	PGS004640	111	0.096 (-0.007, 0.199)	0.00491676
LDLC	PGS004642	111	0.167 (0.042, 0.292)	<0.001
LDLC	PGS004643	111	0.075 (-0.018, 0.168)	0.0158005
LDLC	PGS004644	111	0.130 (0.015, 0.246)	<0.001
LDLC	PGS004646	111	0.105 (-0.002, 0.212)	0.00306175
LDLC	PGS004647	111	0.001 (-0.009, 0.010)	0.861215
LDLC	PGS004648	111	0.131 (0.015, 0.246)	<0.001
LDLC	PGS004649	111	0.126 (0.012, 0.240)	0.00102799
LDLC	PGS004650	111	0.112 (0.003, 0.222)	0.0020136
LDLC	PGS004651	111	0.139 (0.021, 0.257)	<0.001
LDLC	PGS004791	111	0.128 (0.013, 0.242)	<0.001
LDLC	PGS004792	111	0.013 (-0.028, 0.055)	0.386946
LDLC	PGS004793	111	0.117 (0.006, 0.229)	0.00158216
LDLC	PGS004794	111	0.161 (0.038, 0.285)	<0.001
LDLC	PGS004915	111	0.000 (-0.007, 0.008)	0.889107
LDLC	PGS004936	111	0.136 (0.019, 0.253)	<0.001
LDLC	PGS004969	111	0.000 (-0.005, 0.005)	0.924347
LDLC	PGS004970	111	0.012 (-0.028, 0.051)	0.420359
LDLC	PGS004971	111	0.025 (-0.032, 0.081)	0.216165
LDLC	PGS004972	111	0.046 (-0.029, 0.122)	0.0704815
LDLC	PGS004973	111	0.032 (-0.032, 0.096)	0.143921
LDLC	PGS004974	111	0.009 (-0.026, 0.043)	0.490746
LDLC	PGS004975	111	0.004 (-0.019, 0.027)	0.675075
LDLC	PGS004976	111	0.011 (-0.027, 0.048)	0.444348
LDLC	PGS004977	111	0.030 (-0.032, 0.091)	0.16492
LDLC	PGS004978	111	0.060 (-0.025, 0.145)	0.0348749
LDLC	PGS004979	111	0.027 (-0.032, 0.087)	0.188659
LDLC	PGS004980	111	0.019 (-0.031, 0.069)	0.290021
LDLC	PGS004981	111	0.040 (-0.031, 0.111)	0.0970454
LPa	Face	35	0.111 (-0.070, 0.292)	0.11975
LPa	PGS000671	35	0.001 (-0.013, 0.014)	0.928069
LPa	PGS001888	35	0.045 (-0.079, 0.169)	0.36646
LPa	PGS002101	35	0.036 (-0.076, 0.147)	0.437694
LYM	Face	111	0.006 (-0.022, 0.034)	0.596967
LYM	PGS000097	111	0.003 (-0.017, 0.024)	0.7145
LYM	PGS000172	111	0.005 (-0.020, 0.030)	0.639857
LYM	PGS001965	111	0.003 (-0.016, 0.022)	0.735252
LYM	PGS002183	111	0.002 (-0.013, 0.016)	0.794387
LYM	PGS002338	111	0.005 (-0.020, 0.029)	0.644264
LYM	PGS002370	111	0.010 (-0.026, 0.046)	0.465299
LYM	PGS002410	111	0.003 (-0.016, 0.022)	0.735252
LYM	PGS002459	111	0.002 (-0.014, 0.018)	0.773768
LYM	PGS002508	111	0.009 (-0.026, 0.044)	0.479623
LYM	PGS002557	111	0.001 (-0.009, 0.010)	0.859542
LYM	PGS002606	111	0.001 (-0.009, 0.010)	0.859542
LYM	PGS002655	111	0.015 (-0.029, 0.060)	0.353237
LYM	PGS002704	111	0.006 (-0.022, 0.034)	0.590156
LYM	PGS003475	111	0.022 (-0.031, 0.075)	0.249283
LYM	PGS003936	111	0.002 (-0.015, 0.020)	0.752128
LYM	PGS004356	111	0.001 (-0.010, 0.011)	0.842587
MPV	Face	111	0.018 (-0.030, 0.066)	0.311203
MPV	PGS000179	111	0.043 (-0.030, 0.115)	0.0867558
MPV	PGS001200	111	0.069 (-0.021, 0.160)	0.0219518
MPV	PGS001971	111	0.120 (0.008, 0.232)	0.00134249
MPV	PGS002189	111	0.134 (0.017, 0.250)	<0.001
MPV	PGS002340	111	0.138 (0.020, 0.256)	<0.001
MPV	PGS002412	111	0.098 (-0.006, 0.201)	0.00456211
MPV	PGS002461	111	0.075 (-0.018, 0.168)	0.0159776
MPV	PGS002510	111	0.000 (-0.005, 0.005)	0.928069
MPV	PGS002559	111	0.094 (-0.008, 0.196)	0.0055468
MPV	PGS002608	111	0.084 (-0.014, 0.182)	0.0095296
MPV	PGS002657	111	0.114 (0.004, 0.224)	0.00183628
MPV	PGS002706	111	0.108 (0.000, 0.216)	0.00267008
MPV	PGS003548	111	0.150 (0.029, 0.271)	<0.001
MPV	PGS003934	111	0.095 (-0.008, 0.197)	0.00525192
MPV	PGS004354	111	0.084 (-0.014, 0.182)	0.0095296
NE	Face	111	0.051 (-0.028, 0.129)	0.0559332
NE	PGS000105	111	0.097 (-0.006, 0.200)	0.00467657
NE	PGS000182	111	0.051 (-0.028, 0.130)	0.0546107
NE	PGS001173	111	0.093 (-0.009, 0.194)	0.0058728
NE	PGS001969	111	0.079 (-0.016, 0.174)	0.0126045
NE	PGS002187	111	0.096 (-0.007, 0.199)	0.00491676
NE	PGS003545	111	0.108 (0.000, 0.216)	0.00267008
NE	PGS003938	111	0.018 (-0.031, 0.067)	0.298774
NE	PGS004358	111	0.038 (-0.031, 0.107)	0.107025
NE	PGS004805	111	0.106 (-0.001, 0.213)	0.00291471
NE	PGS004806	111	0.036 (-0.031, 0.103)	0.121648
NE	PGS004807	111	0.078 (-0.017, 0.172)	0.0132894
NE	PGS004808	111	0.041 (-0.031, 0.112)	0.0968962
PLT	Face	111	0.001 (-0.008, 0.010)	0.865136
PLT	PGS000109	111	0.085 (-0.013, 0.183)	0.00923674
PLT	PGS000186	111	0.066 (-0.022, 0.154)	0.0253516
PLT	PGS001238	111	0.133 (0.017, 0.250)	<0.001
PLT	PGS001973	111	0.084 (-0.014, 0.182)	0.0095296
PLT	PGS002191	111	0.067 (-0.022, 0.155)	0.0248378
PLT	PGS002343	111	0.117 (0.006, 0.228)	0.00159802
PLT	PGS002415	111	0.075 (-0.018, 0.168)	0.0157573
PLT	PGS002464	111	0.083 (-0.014, 0.180)	0.0101505
PLT	PGS002513	111	0.017 (-0.030, 0.065)	0.317065
PLT	PGS002562	111	0.027 (-0.032, 0.086)	0.191555
PLT	PGS002611	111	0.061 (-0.024, 0.146)	0.0326408
PLT	PGS002660	111	0.079 (-0.016, 0.175)	0.0123703
PLT	PGS002709	111	0.092 (-0.009, 0.193)	0.00604916
PLT	PGS003546	111	0.097 (-0.006, 0.201)	0.00464008
PLT	PGS003932	111	0.121 (0.008, 0.233)	0.00132477
PLT	PGS004352	111	0.034 (-0.032, 0.100)	0.1316
PLT	PGS004582	111	0.012 (-0.028, 0.051)	0.424349
PLT	PGS004583	111	0.011 (-0.027, 0.050)	0.428642
PLT	PGS004811	111	0.106 (-0.001, 0.213)	0.00291471
T-Bil	Face	111	0.013 (-0.028, 0.054)	0.389867
T-Bil	PGS000681	111	0.115 (0.005, 0.226)	0.00169551
T-Bil	PGS001942	111	0.132 (0.016, 0.248)	<0.001
T-Bil	PGS002160	111	0.115 (0.005, 0.225)	0.00174568
T-Bil	PGS003524	111	0.121 (0.009, 0.234)	0.00128563
T-Bil	PGS004206	111	0.181 (0.053, 0.309)	<0.001
T-Bil	PGS004207	111	0.181 (0.053, 0.309)	<0.001
T-Bil	PGS004208	111	0.182 (0.054, 0.310)	<0.001
T-Bil	PGS004209	111	0.174 (0.047, 0.301)	<0.001
T-Bil	PGS004210	111	0.180 (0.052, 0.308)	<0.001
T-Bil	PGS004731	111	0.124 (0.011, 0.238)	0.00109833
T-Bil	PGS004732	111	0.135 (0.018, 0.252)	<0.001
TC	Face	111	0.020 (-0.031, 0.072)	0.272355
TC	PGS000062	111	0.011 (-0.027, 0.049)	0.441303
TC	PGS000311	111	0.000 (-0.001, 0.001)	0.9798
TC	PGS000658	111	0.000 (-0.005, 0.005)	0.928069
TC	PGS000677	111	0.129 (0.014, 0.244)	<0.001
TC	PGS000831	111	0.106 (-0.001, 0.213)	0.00291471
TC	PGS001895	111	0.081 (-0.015, 0.177)	0.0111883
TC	PGS002108	111	0.098 (-0.006, 0.202)	0.00454523
TC	PGS002286	111	0.068 (-0.021, 0.158)	0.0231869
TC	PGS002352	111	0.099 (-0.006, 0.203)	0.00442297
TC	PGS002377	111	0.117 (0.006, 0.228)	0.00159802
TC	PGS002424	111	0.090 (-0.010, 0.191)	0.0065024
TC	PGS002473	111	0.055 (-0.027, 0.136)	0.0448613
TC	PGS002571	111	0.081 (-0.015, 0.178)	0.0110556
TC	PGS002620	111	0.083 (-0.014, 0.180)	0.0100426
TC	PGS002669	111	0.135 (0.018, 0.252)	<0.001
TC	PGS002718	111	0.033 (-0.032, 0.097)	0.140362
TC	PGS002783	111	0.214 (0.080, 0.347)	<0.001
TC	PGS003135	111	0.080 (-0.016, 0.176)	0.0119598
TC	PGS003136	111	0.104 (-0.002, 0.210)	0.00320932
TC	PGS003137	111	0.154 (0.032, 0.276)	<0.001
TC	PGS003138	111	0.086 (-0.013, 0.184)	0.00894618
TC	PGS003139	111	0.075 (-0.018, 0.169)	0.0153224
TC	PGS003140	111	0.073 (-0.019, 0.165)	0.0174337
TC	PGS003141	111	0.104 (-0.002, 0.211)	0.00317911
TC	PGS003142	111	0.142 (0.023, 0.261)	<0.001
TC	PGS003143	111	0.073 (-0.019, 0.164)	0.0181107
TC	PGS003341	111	0.001 (-0.010, 0.012)	0.841701
TC	PGS003350	111	0.001 (-0.010, 0.012)	0.841701
TC	PGS003481	111	0.041 (-0.030, 0.112)	0.0961184
TC	PGS003495	111	0.079 (-0.016, 0.174)	0.0126045
TC	PGS003818	111	0.065 (-0.023, 0.153)	0.0263269
TC	PGS003819	111	0.060 (-0.025, 0.144)	0.0353008
TC	PGS003820	111	0.067 (-0.022, 0.156)	0.0245645
TC	PGS003822	111	0.015 (-0.030, 0.060)	0.348773
TC	PGS003823	111	0.118 (0.007, 0.230)	0.00151841
TC	PGS003824	111	0.125 (0.011, 0.239)	0.00105685
TC	PGS003826	111	0.084 (-0.014, 0.182)	0.0095296
TC	PGS003828	111	0.005 (-0.020, 0.030)	0.641393
TC	PGS003829	111	0.100 (-0.005, 0.205)	0.00405022
TC	PGS003831	111	0.061 (-0.024, 0.147)	0.0323042
TC	PGS003832	111	0.016 (-0.030, 0.061)	0.346094
TC	PGS003833	111	0.157 (0.034, 0.280)	<0.001
TC	PGS003834	111	0.173 (0.046, 0.299)	<0.001
TC	PGS004667	111	0.110 (0.001, 0.218)	0.00245137
TC	PGS004668	111	0.101 (-0.004, 0.206)	0.00379553
TC	PGS004670	111	0.142 (0.023, 0.261)	<0.001
TC	PGS004671	111	0.145 (0.025, 0.265)	<0.001
TC	PGS004672	111	0.091 (-0.010, 0.192)	0.00638348
TC	PGS004673	111	0.096 (-0.007, 0.199)	0.00485281
TC	PGS004674	111	0.157 (0.034, 0.279)	<0.001
TC	PGS004675	111	0.159 (0.036, 0.283)	<0.001
TC	PGS004676	111	0.167 (0.042, 0.292)	<0.001
TC	PGS004677	111	0.006 (-0.022, 0.033)	0.601343
TC	PGS004678	111	0.047 (-0.029, 0.122)	0.0699082
TC	PGS004679	111	0.135 (0.018, 0.252)	<0.001
TC	PGS004681	111	0.153 (0.031, 0.276)	<0.001
TC	PGS004841	111	0.146 (0.026, 0.266)	<0.001
TC	PGS004842	111	0.142 (0.023, 0.260)	<0.001
TC	PGS004843	111	0.150 (0.029, 0.272)	<0.001
TC	PGS004844	111	0.162 (0.038, 0.286)	<0.001
TP	Face	111	0.001 (-0.011, 0.013)	0.825309
TP	PGS000698	111	0.001 (-0.011, 0.012)	0.834543
TP	PGS002001	111	0.001 (-0.008, 0.009)	0.879149
TP	PGS002219	111	0.001 (-0.011, 0.014)	0.82
TP	PGS004341	111	0.027 (-0.032, 0.086)	0.193735
TP	PGS004849	111	0.002 (-0.013, 0.016)	0.790662
TP	PGS004850	111	0.000 (-0.001, 0.001)	0.9798
TP	PGS004851	111	0.003 (-0.017, 0.022)	0.729513
TP	PGS004852	111	0.007 (-0.023, 0.036)	0.57369
UA	Face	111	0.164 (0.040, 0.289)	<0.001
UA	PGS002290	111	0.005 (-0.021, 0.030)	0.634471
Urea	Face	111	0.089 (-0.011, 0.188)	0.00736854
Urea	PGS001980	111	0.103 (-0.003, 0.208)	0.00350747
Urea	PGS002198	111	0.143 (0.023, 0.262)	<0.001
Urea	PGS003553	111	0.121 (0.008, 0.233)	0.00131712
Urea	PGS004331	111	0.004 (-0.019, 0.027)	0.675075
Urea	PGS004739	111	0.131 (0.015, 0.247)	<0.001
Urea	PGS004740	111	0.116 (0.006, 0.227)	0.00159802
Urea	PGS004741	111	0.127 (0.013, 0.242)	<0.001
Urea	PGS004742	111	0.116 (0.006, 0.227)	0.00159802
Weight	Face	66	0.504 (0.339, 0.668)	<0.001
Weight	PGS001006	66	0.025 (-0.047, 0.097)	0.355721
Weight	PGS001234	66	0.031 (-0.049, 0.111)	0.295834
Weight	PGS001235	66	0.030 (-0.048, 0.108)	0.312096
Weight	PGS003490	66	0.107 (-0.030, 0.243)	0.0260336
Weight	PGS003898	66	0.117 (-0.024, 0.257)	0.0185821
Weight	PGS004373	66	0.003 (-0.023, 0.030)	0.773768
Weight	PGS004388	66	0.000 (-0.005, 0.006)	0.944102
Weight	PGS004392	66	0.001 (-0.011, 0.013)	0.896602
Weight	PGS004396	66	0.007 (-0.032, 0.047)	0.653937
Weight	PGS004400	66	0.010 (-0.036, 0.057)	0.590992
Weight	PGS004404	66	0.001 (-0.012, 0.013)	0.892958
Weight	PGS004410	66	0.003 (-0.023, 0.029)	0.780644
Weight	PGS004412	66	0.012 (-0.038, 0.062)	0.556426
Weight	PGS004416	66	0.003 (-0.023, 0.030)	0.773768
Weight	PGS004421	66	0.003 (-0.021, 0.026)	0.795421
eGFR(CKD-EPI)	Face	111	0.189 (0.059, 0.318)	<0.001
eGFR(CKD-EPI)	PGS000303	111	0.000 (-0.004, 0.004)	0.933767
eGFR(CKD-EPI)	PGS000682	111	0.000 (-0.005, 0.005)	0.928069
eGFR(CKD-EPI)	PGS000860	111	0.001 (-0.011, 0.013)	0.822493
eGFR(CKD-EPI)	PGS000884	111	0.017 (-0.030, 0.064)	0.323358
eGFR(CKD-EPI)	PGS000885	111	0.001 (-0.012, 0.015)	0.806562
eGFR(CKD-EPI)	PGS002810	111	0.007 (-0.024, 0.039)	0.541247
eGFR(CKD-EPI)	PGS003220	111	0.005 (-0.020, 0.030)	0.639857
eGFR(CKD-EPI)	PGS003222	111	0.000 (-0.006, 0.007)	0.912584
eGFR(CKD-EPI)	PGS003223	111	0.002 (-0.015, 0.020)	0.761371
eGFR(CKD-EPI)	PGS003224	111	0.005 (-0.021, 0.032)	0.61984
eGFR(CKD-EPI)	PGS003225	111	0.014 (-0.029, 0.057)	0.365179
eGFR(CKD-EPI)	PGS003226	111	0.014 (-0.029, 0.057)	0.365179
eGFR(CKD-EPI)	PGS003227	111	0.000 (-0.000, 0.000)	0.99502
eGFR(CKD-EPI)	PGS003228	111	0.003 (-0.018, 0.024)	0.713352
eGFR(CKD-EPI)	PGS003989	111	0.003 (-0.016, 0.022)	0.737178
eGFR(CKD-EPI)	PGS004005	111	0.000 (-0.000, 0.000)	0.994908
eGFR(CKD-EPI)	PGS004017	111	0.002 (-0.014, 0.017)	0.778462
eGFR(CKD-EPI)	PGS004031	111	0.006 (-0.023, 0.035)	0.589084
eGFR(CKD-EPI)	PGS004046	111	0.010 (-0.026, 0.046)	0.462945
eGFR(CKD-EPI)	PGS004059	111	0.003 (-0.016, 0.022)	0.735252
eGFR(CKD-EPI)	PGS004075	111	0.006 (-0.023, 0.035)	0.589084
eGFR(CKD-EPI)	PGS004089	111	0.006 (-0.022, 0.034)	0.590156
eGFR(CKD-EPI)	PGS004113	111	0.006 (-0.022, 0.033)	0.601343
eGFR(CKD-EPI)	PGS004129	111	0.004 (-0.020, 0.028)	0.65949
eGFR(CKD-EPI)	PGS004143	111	0.010 (-0.027, 0.047)	0.451445
eGFR(CKD-EPI)	PGS004159	111	0.003 (-0.018, 0.024)	0.711644
Note: Face represents the predictor derived from FaceFound.

## Sheet: Supplementary Table 8
Relative importance of polygenic risk scores (PRS) and face prediction in the AZ-GEV cohort
Biomarker Name	FaceFound	Genetics
ALP	0.0206355	0.979365
ALT	0.825379	0.174621
AST	0.0311789	0.968821
Alb	0.738711	0.261289
BMI	0.821486	0.178514
Cr	0.906512	0.0934879
GGT	0.640677	0.359323
Glu	0.511985	0.488015
HCT	0.880988	0.119012
HDLC	0.751853	0.248147
Hb	0.879329	0.120671
Height	0.877484	0.122516
Isn	0.00217215	0.997828
LDLC	0.00704759	0.992952
LPa	0.761843	0.238157
LYM	0.149032	0.850968
MPV	0.102204	0.897796
NE	0.308363	0.691637
PLT	0.00811214	0.991888
T-Bil	0.0949411	0.905059
TC	0.0533531	0.946647
TP	0.0552573	0.944743
UA	0.949941	0.050059
Urea	0.379866	0.620134
Weight	0.860476	0.139524
eGFR(CKD-EPI)	0.913111	0.0868894

## Sheet: Supplementary Table 9
Associations between cardiovascular-related biomarkers (face-predicted and laboratory-measured) and vascular stenosis severity (＜50% verse ≥50%).
Biomarker Name	OR/SD (Lab measurement)	P value (Lab measurment)	OR/SD (Facial prediction)	P value (Facial prediction)
BNP	1.121 (0.980, 1.284)	0.0964216	0.744 (0.639, 0.866)	0.000141371
CK	0.883 (0.778, 1.004)	0.0568497	0.971 (0.777, 1.212)	0.79293
CK-MB	0.937 (0.745, 1.179)	0.580899	1.009 (0.856, 1.188)	0.9173
D-Dimer	1.038 (0.806, 1.337)	0.774071	0.723 (0.623, 0.839)	1.98983e-05
HDLC	0.856 (0.749, 0.978)	0.0223287	0.705 (0.579, 0.858)	0.000478908
HbA1C%	1.322 (1.117, 1.565)	0.00117864	1.359 (1.186, 1.558)	9.84855e-06
Hcy	1.055 (0.909, 1.225)	0.481301	1.012 (0.863, 1.186)	0.882444
LDH	1.012 (0.893, 1.146)	0.85729	0.906 (0.762, 1.077)	0.261268
LDLC	0.726 (0.636, 0.829)	2.30224e-06	1.445 (1.252, 1.668)	5.05335e-07
LPa	1.121 (0.861, 1.459)	0.396316	0.902 (0.789, 1.032)	0.1335
TC	0.709 (0.623, 0.805)	1.36624e-07	0.888 (0.757, 1.041)	0.143496
TG	1.051 (0.926, 1.192)	0.440495	1.180 (1.014, 1.372)	0.0319843
hs-CRP	1.024 (0.884, 1.185)	0.753046	1.365 (1.190, 1.566)	9.13564e-06
hsTnI	1.621 (1.123, 2.339)	0.00981709	1.351 (1.166, 1.565)	6.41202e-05
nonHDL	0.992 (0.788, 1.248)	0.94317	0.907 (0.783, 1.051)	0.195971
sdLDL	0.969 (0.756, 1.242)	0.804568	1.135 (0.975, 1.322)	0.101973

[truncated: 8 more sheets: Supplementary Table 10, Supplementary Table 11, Supplementary Table 12, Supplementary Table 13, Supplementary Table 14, Supplementary Table 15, Supplementary Table 16, Supplementary Table 17]
